1 **High resolution cryo EM analysis of HPV16 identifies minor structural protein L2 and**  
2 **describes capsid flexibility**

3 Daniel J. Goetschius<sup>1,2\*</sup>, Samantha R. Hartmann<sup>1\*</sup>, Suriyasri Subramanian<sup>2</sup>, Carol Bator<sup>1</sup>, Neil D.  
4 Christensen<sup>3,4,5</sup>, Susan L Hafenstein<sup>1,2\*\*</sup>

5 <sup>1</sup>Department of Biochemistry and Molecular Biology, Penn State University, University  
6 Park, PA 16802, USA

7 <sup>2</sup>Department of Medicine, Penn State University College of Medicine, Hershey, PA  
8 17033, USA

9 <sup>3</sup>Department of Pathology, Pennsylvania State University College of Medicine, Hershey,  
10 PA 17033, USA

11 <sup>4</sup>The Jake Gittlen Laboratories for Cancer Research, Hershey, PA 17033, USA

12 <sup>5</sup> Department of Microbiology and Immunology, Pennsylvania State University College  
13 of Medicine, Hershey, PA 17033, USA

14 \* Equal contribution

15 \*\* Corresponding: [shafenstein@psu.edu](mailto:shafenstein@psu.edu)

16

17 Running Title: HPV16 structure

18 Keywords: L2 structure, HPV16, quasivirus, local refinement, subvolume refinement, cryo EM

19

20 **Abstract**

21 Human papillomavirus (HPV) is a significant health burden and leading cause of virus-induced  
22 cancers. HPV is epitheliotropic and its replication is tightly associated with terminal keratinocyte  
23 differentiation making production and purification of high titer virus preparations for research  
24 problematic, therefore alternative HPV production methods have been developed for virological  
25 and structural studies. In this study we use HPV16 quasivirus, composed of HPV16 L1/L2 capsid  
26 proteins with a packaged cottontail rabbit papillomavirus genome. We have achieved the first  
27 high resolution, 3.1Å, structure of HPV16 by using a local subvolume refinement approach. The  
28 high resolution enabled us to build L1 unambiguously and identify L2 protein strands. The L2  
29 density is incorporated adjacent to conserved L1 residues on the interior of the capsid. Further  
30 interpretation with our own software for Icosahedral Subvolume Extraction and Correlated  
31 Classification (ISECC) revealed flexibility, on the whole-particle level through diameter analysis  
32 and local movement with inter-capsomer analysis. Inter-capsomer expansion or contraction,  
33 governed by the connecting arms, showed no bias in the magnitude or direction of capsomer  
34 movement. We propose that papillomavirus capsids are dynamic and capsomers move as rigid  
35 bodies connected by flexible linkers. The resulting virus structure will provide a framework for  
36 continuing biochemical, genetic and biophysical research for papillomaviruses. Furthermore, our  
37 approach has allowed insight into the resolution barrier that has previously been a limitation in  
38 papillomavirus structural studies.

39

#### 40 **Introduction:**

41 Human papillomaviruses (HPVs) cause epithelial tumors and are the etiologic agents of  
42 numerous anogenital and oropharyngeal cancers(Bosch et al., 1995; Crow, 2012; Walboomers et  
43 al., 1999). HPV is implicated in more than 70% of head, neck, and throat cancers, the occurrence

44 of which has been increasing steadily, specifically in a younger group of non-smoking 40-50  
45 year old white men (Lewis et al., 2015; Lydiatt et al., 2017). Although there are over one  
46 hundred known genotypes, HPV16 is associated with 50% of all cervical cancers and 90% of all  
47 other HPV-containing anogenital and oropharyngeal malignancies(zur Hausen, 1991). We used  
48 HPV16 in this study due to its disproportionate contribution to human disease.

49 HPV is epitheliotropic and its replication is tightly associated with terminal keratinocyte  
50 differentiation making production and purification of high-titer virus preparations for research  
51 problematic. Consequently, alternative HPV production methods of virus-like particles (VLPs)  
52 have been developed within the HPV community for virological and structural studies. Capsid  
53 protein only VLPs can be composed of the major structural protein (L1) alone, or of the major  
54 and minor capsid proteins (L1/L2) and are not infectious since they are devoid of viral  
55 genomes(Hernandez et al., 2012; Kirnbauer et al., 1992, 1993). Pseudovirus is comprised of both  
56 structural proteins (L1/L2) with plasmid DNA packaged as a mock genome(Buck, Pastrana, et  
57 al., 2005; Buck, Thompson, et al., 2005). Quasivirus is similarly comprised of both structural  
58 proteins (L1/L2), but packaged with a cottontail rabbit papillomavirus genome (CRPV) to  
59 assemble a structurally complete L1/L2 capsid that is infectious (Christensen, 2005). All these  
60 different HPV VLPs preserve the main attributes of the native capsid structure and have been  
61 used successfully for vaccine development and for studies of antigenicity, receptor usage, entry  
62 mechanisms, and structural analyses. Quasiviruses were used throughout the work described  
63 here.

64 Human papillomaviruses are non-enveloped, circular dsDNA containing viruses with  
65 capsids comprised of 360 copies of the major capsid protein, L1, and an uncertain number of the  
66 minor structural protein, L2(Buck et al., 2008a; Finch & Klug, 1965). Five copies of L1

67 intertwine to form each of the 72 capsomers that make up the  $T=7d$  icosahedron. The L2  
68 structure is unknown and its capsid incorporation is unclear. L1 takes the form of the ubiquitous  
69 jellyroll of anti-parallel beta strands (BIDG and CHEF), which are connected by flexible loops  
70 that extend outward from the surface of the capsomer and constitute the majority of the L1  
71 hypervariable regions. Pentavalent capsomers lie on the icosahedral five-fold axis and are  
72 surrounded by five neighboring capsomers. The remaining sixty hexavalent capsomers are each  
73 bordered by six capsomers. To form the icosahedral capsid the pentavalent and hexavalent  
74 environments confer quasi-equivalent conformations of L1. The asymmetric unit is comprised of  
75 six L1s, five of which make up a single hexavalent capsomer and one L1 that contributes to a  
76 pentavalent capsomer (Fig 1.A-B). An extension of each L1 C-terminal arm links capsomers  
77 through the formation of disulfide bonds between Cys 428 and Cys 175 of the adjacent capsomer  
78 (Buck, Thompson, et al., 2005; Sapp et al., 1998).

79         Previously solved structures of HPV16 capsids have been limited by modest resolution.  
80 Although there are high resolution x-ray crystallography maps of the HPV16 L1 pentamer, the  
81 complete HPV  $T=7d$  capsid has only been visualized by cryo EM (X. S. Chen et al., 2000;  
82 Dasgupta et al., 2011). Currently, all reconstructions of the entire capsid have been resolved with  
83 the use of icosahedral symmetry averaging, and the highest resolution structure is 4.3 Å (Baker et  
84 al., 1991; Buck et al., 2008b; Cardone et al., 2014; Guan, Bywaters, Brendle, Lee, Ashley,  
85 Makhov, et al., 2015; Guan, Bywaters, Brendle, Lee, Ashley, Christensen, et al., 2015; Guan et  
86 al., 2017b; Lee et al., 2015, p. 5). The commonality between all HPV structures that have been  
87 published is the reliable fit of only the major capsid protein, L1.

88         Although controversy remains about the number and positioning of L2 proteins  
89 incorporated into the capsid, L2 has been predicted to bind in the center of the capsomer with

90 part of the N-terminus exposed on the surface(Lowe et al., 2008). Some stoichiometric studies  
91 have indicated that there are between 12-36 L2 molecules per HPV capsid(Okun et al., 2001).  
92 However, other studies have suggested the amount of L2 per capsid is variable, and may include  
93 up to 72 L2 molecules per capsid, perhaps one within each capsomer(Buck et al., 2008a; Doorbar  
94 & Gallimore, 1987; Trus et al., 1997). Specific L2 functions have been determined and include  
95 facilitating the encapsidation of DNA, involvement in the conformational changes of the capsid  
96 during entry, disruption of the endosomal membrane, and subcellular trafficking of the viral  
97 genome(Bronnimann et al., 2013; Buck et al., 2008b, p. 2; Raff et al., 2013).

98         There have been many advances in cryo EM mainly in hardware and reconstruction  
99 software that have made it possible to obtain atomic resolution structures of viruses and other  
100 macromolecules(Bai et al., 2015; Goetschius, Parrish, et al., 2019). Cryo EM reconstructions of  
101 icosahedral viruses traditionally use symmetry averaging to refine the capsid; however, more  
102 recent software developments including localized reconstruction and block-based reconstruction  
103 allow subvolumes to be designated for additional refinement(Ilca et al., 2015)(Zhu et al., 2018).  
104 These approaches improve map resolution by reconstructing smaller subvolumes of the virus,  
105 which often compensates for capsid-wide flexibility and the defocus gradient over the capsid.  
106 These advances have also allowed for resolution of asymmetric features, such as minor capsid  
107 proteins that do not follow strict icosahedral symmetry(Goetschius, Parrish, et al., 2019; Ilca et  
108 al., 2015; Zhu et al., 2018).

109         In this study we used a subparticle refinement approach that allowed us to overcome the  
110 previous resolution barriers in HPV structural studies. We developed custom software,  
111 Icosahedral Subvolume Extraction & Correlated Classification (ISECC), to assess capsid  
112 flexibility on a per particle basis. Our high resolution map provided the most reliable structure of

113 L1 to date, including corrections to the previous model. The structure also revealed for the first  
114 time unambiguous L2 density adjacent to a conserved L1 loop. Assessment of capsid flexibility  
115 revealed dynamic capsids with imperfect icosahedral symmetry. This continuous heterogeneity is  
116 the likely cause of limited resolution of HPV structure in previous studies and may play a role in  
117 crucial biological processes. The work describes methods to achieve high resolution that will lay  
118 the groundwork for future structural studies of papillomaviruses and polyomavirus.

119

## 120 **Results:**

### 121 **Imposing icosahedral symmetry during refinement results in a moderate resolution map.**

122 Cryo EM micrographs showed virus particles of approximately 50 nm diameter  
123 composed of discrete, discernable capsomers (S. Fig 1.A). Consistent with previous studies,  
124 variation existed among virus particles, including the occasional rod-like structure(Guan et al.,  
125 2017b). Using a standard processing pipeline (Methods) 202,705 particles were classified to  
126 select 181,299 particles that contained internal density consistent with packaged genome.  
127 Icosahedral symmetry averaging was imposed during refinement to produce a 4.5 Å resolution  
128 map. At this resolution  $\alpha$ -helices and  $\beta$ -sheets were discernable; however, the new map provided  
129 no improvement over previously published structures and a true atomic model could not be built.  
130 This result was disappointing considering the high quality micrographs, a large particle number,  
131 well-defined 2D classes (S. Fig 1), and advances in software since the 4.3Å HPV16 structure was  
132 published by Guan, et al. in 2017(Bai et al., 2015; Goetschius, Lee, et al., 2019; Guan et al.,  
133 2017a, p. 4, 2017b).

### 134 **Using a subvolume reconstruction approach resulted in high resolution.**

135 Icosahedral averaging alone could not compensate for the heterogeneity among the  
136 capsids that is likely due to the flexibility between capsomers. To overcome and characterize  
137 capsid flexibility we developed Icosahedral Subvolume Extraction & Correlated Classification  
138 (ISECC), a suite of programs inspired by the Localized Reconstruction approach (Abrishami et  
139 al., 2020; Ilca et al., 2015). ISECC both defines the subparticles for local refinement and  
140 provides metadata for subsequent analysis. Here we defined the subparticles for extraction to  
141 correspond to pentavalent and hexavalent capsomers. After extraction, local refinement resulted  
142 in subvolume maps with local resolution ranging from 2.9-3.3Å with the beta-jellyroll motif of  
143 the capsomer cores attaining better resolution than the solvent-exposed variable loops (Fig 1.C-  
144 D). The high resolution capsomer maps were recombined into an icosahedral capsid with 3.1Å  
145 resolution overall (ISECC\_recombine) (Fig 1.E-F), a dramatic improvement over the original  
146 4.5Å map (Fig 2). The recombined map allowed the full asymmetric unit (Fig 2.C) of HPV to be  
147 unambiguously built for the first time.

148 Notably, resolution did not improve beyond 3.1Å, despite exceptional subparticle number  
149 (pentavalent: 2,175,588, hexavalent 10,877,940), which suggested the presence of additional  
150 heterogeneity. However, multiple attempts to 3D classify the subparticles, both before and after  
151 local refinement, failed to produce structurally distinct classes. This suggested that the signal-to-  
152 noise ratio (SNR) is the limiting factor in achieving truly atomic resolution. Optimized and  
153 iterative subtraction of neighboring subparticles might improve the resolution further, but such  
154 an experiment would require new software development and achieve modest improvements if  
155 successful.

156 **A new, accurate structure for L1 was built into the high resolution map.**

157           The previous L1 structure (PDB ID 5KEP) was accurate to only modest resolution since  
158 it was generated from a 4.3 Å cryo EM density map(Guan et al., 2017b). However, as the model  
159 contained the asymmetric unit, it was used to initiate the build. Each L1 chain of the asymmetric  
160 unit was initially built into the corresponding capsomer subvolume density. The pentavalent  
161 capsomer is comprised of chain A with connecting arms from chain F, whereas, the hexavalent  
162 capsomer is comprised of chains B-F with the connecting arms from chains A-E (Fig 1A-B).

163           After refining the structures in each of the subvolumes, the six L1 chains were assembled  
164 into the asymmetric unit. This pdb was then validated against the recombined map (S. Table 1).  
165 The resolution allowed unambiguous placement of most sidechains (S. Fig 2) and presented  
166 continuous density for most of the termini. For the six chains of the asymmetric unit (Fig 1.A-B,  
167 chains A-F) there was strong continuous density stretching from Tyr12 to Arg485 (A), Val16 to  
168 Phe480 (B), Met1 to Phe480 (C & D), Leu3 to Gly483 (E), and Met1 to Gly483 (F) respectively.  
169 The refined structure superimposed with 5KEP with a C-alpha root mean squared deviation  
170 (RMSD) of 2.37Å. The improved resolution of our map when compared to the previous 4.3Å  
171 structure (Guan *et al.*) allowed us to correct the 36 residues making up the C-terminal arm  
172 extensions (402 to 439)(Guan et al., 2017b). This map clearly resolved density corresponding to  
173 the Lys475 to Phe480 loop that was previously incorrectly assigned. N-terminal residues starting  
174 from Met 1, which had previously been unresolved, were now assigned for most of the chains in  
175 the asymmetric unit. Overall, the density in this map allowed clear assignment of residues and  
176 corrected the HPV16 L1 structure within the context of the icosahedral capsid.

### 177 **Each connecting arm has a different conformation**

178           The pentavalent and hexavalent L1 capsomers share a common core architecture but have  
179 different connecting arm structures (residues 402-439). The connecting arm extends from the



180 base of the donor capsomer, looping into the neighboring capsomer to make a disulfide bond  
181 between Cys428 of the connecting arm and Cys175 of the neighboring capsomer, and then  
182 returns to the donor above the initial extension.

183 Capsomers superimposed with a c-alpha RMSD of 2.75Å (Fig 3.A); however, after  
184 exclusion of connecting arm and N-terminal residues 1-23 (Fig 3.B) the c-alpha RMSD was  
185 0.52Å. These differences are further described by comparing each copy of L1 (chains A-F) that  
186 makes up the asymmetric unit (Fig 3.C). The six chains of L1 superimposed with a c-alpha  
187 RMSD of 6.16Å, and with the removal of the connecting arms (402-439) and N-terminal  
188 residues (1-23) resulted in an RMSD of 0.38Å (Fig 3.D), demonstrating the beta-jellyroll  
189 stability in the core of L1. The differing conformations of the connecting arms were then  
190 investigated to evaluate the extent of similarities and differences. All six conformations were  
191 superimposed from amino acid residues 385 to 472 to include the flanking alpha helices for  
192 alignment purposes. The overall RMSD of all six connecting arms was 8.56Å (Fig 3.E). When  
193 evaluating the connecting arms pairwise RMSD values ranged from 1.35 to 18.23Å, with the  
194 best RMSD values for the pairwise alignment between hexavalent chain F and pentavalent chain  
195 A (RMSD:1.35Å) (Fig 3.F).

196 **The same flexible region comprised of nine amino acids is seen in each connecting arm**  
197 **conformation.**

198 The fit of these connecting arms revealed that the same sequence was found in different  
199 conformations. The connecting arms were resolved to a more modest resolution compared to the  
200 capsomer core. Specifically, the surface exposed region of the arms from His431 to Asp439 was  
201 found to be poorly resolved in each chain, even though the connecting arms are in varying  
202 conformations. The most compact conformation was in L1 chains A and F, whereas in chains D

203 and E the conformation was the most extended, with chains B and C exhibiting an intermediate  
204 structure (Fig 3.E).

### 205 **Both pentavalent and hexavalent capsomers have non-L1 density**

206 After refining L1 into the density of the pentavalent and hexavalent capsomers, there was  
207 unfilled density on the interior in two distinct locations (Fig 4.A). These putative L2 densities  
208 appeared as strands with protruding knobs consistent with amino acid side chains. The first  
209 density, approximately four amino acids, had the overall shape of an arcing fishhook located  
210 over L1 Lys475 (Fig 4.B). This fishhook density was present in the previously published  
211 structure by Guan *et al.* but was incorrectly interpreted as L1 due to the moderate resolution of  
212 the previous map. The second, larger L2 density, approximately six amino acids, was found  
213 flanking an L1 loop region that extended from Ser306 to Ile327 (Fig 4.C-D). To assess the region  
214 of L1 that flanked this L2 density, conservation of residues within the L1 306-loop was evaluated  
215 across the nine types of HPV that are incorporated into the GARDASIL<sup>®</sup>9 HPV vaccine (Panatto  
216 *et al.*, 2015). These clinically relevant types possess >10% sequence diversity in L1; however,  
217 the 306-loop was highly conserved and all changes to this region were functionally conserved  
218 mutations (Fig 4.E, S. Table 2). Both of these L2 densities were present with different intensities  
219 within the pentavalent and hexavalent capsomer environments. (S. Fig 3)

220 The fragmented nature of the L2 density suggested the possibility of a symmetry  
221 mismatch between L2 and each L1 capsomer. Thus, to resolve L2 we attempted 3D classification  
222 of capsomers with and without symmetry expansion. However, no classes with distinct,  
223 continuous L2 density arose. This finding suggested two possibilities: (1) there was inadequate  
224 SNR for successful classification (2) L2 may have long disordered stretches between the  
225 locations that we were able to resolve.

## 226 **ISECC allowed correlated analysis of capsomers after local refinement.**

227           The original location of each extracted subvolume was recorded using ISECC (S. Table  
228 3). Hexavalent capsomers were assigned a location relative to the nearest fivefold, threefold, and  
229 twofold symmetry axes, as well as a relative rotational assignment to distinguish the multiple  
230 capsomers most proximal to a given symmetry axis (S. Fig 4). These custom metadata were  
231 stored within the RELION 3.1 star file and after subvolume refinement the translational  
232 adjustments of each capsomer were correlated with respect to the other 71 capsomers, and to the  
233 capsid as a whole.

## 234 **Capsid diameter differences showed Gaussian distribution**

235           The diameter of individual HPV particles was calculated using the capsomer metadata  
236 recorded by ISECC. Particle diameter was defined as the x,y distance along the icosahedral  
237 fivefold axis between pentavalent capsomers on opposite sides of the capsid. In order to  
238 minimize unmeasurable distances out of the image plane, this analysis was necessarily limited to  
239 particles where the polar-opposite fivefold capsomers lay within the same z plane, allowing a 5%  
240 radial tolerance ( $12.9\text{\AA}$ ) from  $z=0$  (Fig 5.A). A diameter difference ratio was calculated for each  
241 qualifying capsid (Methods). Based on the icosahedrally averaged map diameter of  $575\text{\AA}$ , the  
242 95<sup>th</sup> percentile (0.988 – 1.017) corresponded to capsid diameters ranging from approximately  
243  $568 - 585\text{\AA}$ , consistent with the variability of individual capsids observed in the micrographs  
244 (Fig 5.B, S. Fig 1.A). These results are more precise, but consistent with previous efforts to  
245 classify HPV into classes with discrete diameters(Guan et al., 2017b).

## 246 **Capsids have imperfect icosahedral symmetry**

247 In addition to the improved resolution, local subvolume refinement allowed a  
248 determination of capsomer centers and orientations for the first time. The movement of  
249 capsomers relative to their icosahedrally-forced (idealized) parameters suggests flexibility. The  
250 corrected capsomer centers were used to evaluate the relative motions of capsomers within the  
251 imperfectly icosahedral HPV capsids. Capsomer movement was evaluated for all hexavalent  
252 subparticles within 25Å of x,y distance from the particle center. This criterion was selected to  
253 maximize lateral, in-plane movement of capsomers and limit out-of-plane motion, reflected in  
254 defocus, that cannot be recovered using local refinement. An additional filter was used to  
255 exclude any capsomer whose icosahedrally-derived center was within 15Å x,y distance of  
256 another, such as capsomers on the front and back of the capsid, as the identities of such  
257 capsomers could be confused during local refinement (Methods). For each qualifying hexavalent  
258 subparticle, the distances to all six neighboring capsomer centers were calculated based on their  
259 locally refined coordinates (Fig 6.A). These x,y distances were compared to the z-flattened  
260 icosahedrally averaged distances (Fig 6.B). The locally refined distances varied from the  
261 idealized values with a standard deviation of approximately 4%. Each of the four unique patterns  
262 of arm-exchange were defined for analysis as the hexavalent-pentavalent axis (A:F exchange);  
263 the fivefold-adjacent hexavalent-hexavalent axis (unidirectional B arm contribution); the  
264 threefold-adjacent hexavalent-hexavalent axis (C:D exchange); and the twofold hexavalent-  
265 hexavalent axis (E:E exchange). Each axis showed a similar pattern of deviation with expansion  
266 or contraction of 6-7% (95<sup>th</sup> percentile range). There was no obvious correlation of distance  
267 deviations for a given grouping of capsomers (e.g. all contracted or all expanded).

268 Flexibility analysis suggested that variation in capsid diameter is due to variable  
269 contraction or expansion of the flexible C-terminal arms linking the capsomers, which in turn

270 move as rigid bodies. This is consistent with the poor resolution of residues 431-439, found in  
271 the connecting arms, that was seen in all chains of the asymmetric unit in both the icosahedrally  
272 refined and locally refined maps. However, we saw no evidence suggesting that any one  
273 capsomer-to-capsomer linkage is more or less flexible than another. This observation is  
274 surprising considering some capsomers are paired by donation of a single arm (chain B:Null),  
275 whereas others are linked by bidirectional arm exchange (chain E:E, A:F, & C:D) (Fig 6.B).

276

## 277 **Discussion**

278 Previous icosahedral reconstructions of papillomaviruses never surpassed  $\sim 4.3\text{\AA}$   
279 resolution (Guan et al., 2017b). This resolution limitation cannot be directly attributed to the use  
280 of VLPs with unauthentic genome (quasi or pseudovirus), as studies with native papillomavirus  
281 have encountered the same resolution barrier (Wolf et al., 2010). Here we show that even with  
282 recent improvements in cryo EM hardware and software for whole particle sorting, classification,  
283 and averaging, the resolution has not improved. However, we found that HPV responded well to  
284 a subparticle refinement approach that isolated individual capsomers for local refinement. Thus,  
285 we were able to improve the resolution from  $4.5\text{\AA}$  to  $3.1\text{\AA}$ . The maps of individual capsomers  
286 were subsequently recombined to create a  $3.1\text{\AA}$  resolution model of the complete icosahedral  
287 virus capsid.

288 The high resolution and the structure of the L1 asymmetric unit allowed us to better  
289 understand the different conformations of the connecting arms that link capsomers. Although  
290 each L1 chain is chemically identical, each 37 amino acid loop makes a different connection to  
291 its neighboring capsomer, due to quasi-equivalence. When looking at the six chains of the

292 asymmetric unit, the low RMSD of the L1 capsomer cores, compared to the higher RMSD of the  
293 connecting arms, suggests that the L1 core secondary structure is conserved whereas the arms  
294 have different conformations. One thing that is consistent in all chains of L1 within the  
295 asymmetric unit is the modest resolution of His431 to Asp439, which are solvent exposed on the  
296 surface of the virus, and the poor resolution is likely attributed to those nine amino acids being a  
297 source of flexibility.

298         The near atomic resolution of the map allowed us to identify protein-like density unfilled  
299 by L1, which corresponded to the minor capsid protein, L2. In our map we can see clear  
300 separation between the L1 chain and regions of L2, which have likely been stabilized by their  
301 interactions with L1. Notably, there is a high sequence conservation of the flanking L1 residues  
302 that interact with L2 in these regions. However, the L2 density is not as strong as L1 in either  
303 location although the magnitude of L2 density is stronger in the pentavalent than the hexavalent  
304 capsomer (S. Fig 3). Size constraints of the capsomer pore would prevent incorporation of five  
305 copies of L2 in any one capsomer thus indicating a symmetry mismatch between L1 and L2. We  
306 estimate that one or two L2 proteins could fit under each capsomer, consistent with the L2  
307 density magnitude compared to L1. Unfortunately, multiple attempts at 3D classifications failed  
308 to solve a symmetry mismatch between L1 and L2 and produce continuous density between the  
309 L2 fragments that we see. This implies L2 may possess significant disordered stretches between  
310 the resolved regions that are ordered by L1 interactions.

311         Variability in previous L2 stoichiometry studies suggests that L2 is probably  
312 asymmetrically incorporated within the capsid and there may be a range in copy number of L2  
313 proteins per individual capsid within a population. Our results suggest that L2 can be  
314 incorporated into the core of any capsomer, but is more prevalent under the pentavalent

315 capsomers, as indicated by stronger density in these capsomer environments. However, we  
316 cannot rule out that L2 is missing altogether from some capsomers. The wide variability prevents  
317 an estimation of the stoichiometry of L2 which may differ among capsids as discussed above.  
318 Our ability to resolve only small segments of L2 further suggests that the overall structure of L2  
319 is largely disordered, with resolved segments ordered by their interactions with L1.

320         Different HPV capsid diameters are obvious by eye in the micrographs and have been  
321 recorded previously by Guan et al. 2017, but attempts to overcome the heterogeneity by sorting  
322 into discrete classes, failed to achieve better than 4.3Å resolution(Guan et al., 2017b).  
323 Previously, heterogeneity was attributed to the maturation of the capsid, specifically in the  
324 disulfide bonds of the C-terminal extensions (connecting arms) between capsomers(Guan et al.,  
325 2017b). Because subparticle refinement was able to determine the true center of each capsomer,  
326 we were able to use these new values to determine the actual diameter of each capsid on a per  
327 particle basis using ISECC\_local\_motions.py script (Methods). Here, we demonstrated a  
328 measurable contraction and expansion of capsids relative to the icosahedrally-enforced average.  
329 The 95<sup>th</sup> percentile encompasses a range from -1.2 to 1.7% (17Å), covering 15.5 pixels under our  
330 imaging conditions. This range is broad enough that the observed variation cannot be attributed  
331 solely to optical aberrations, imprecise Euler angle assignment, or reference-drift during  
332 subparticle refinement. Notably, refinement of higher order aberrations, magnification  
333 anisotropy, and per-particle defocus parameters failed to improve resolution during whole  
334 particle icosahedral refinement.

335         Additionally, the metadata labels implemented in ISECC were used to track deviations in  
336 the location of discrete capsomers with respect to their neighbors compared to their expected  
337 location in perfect icosahedral symmetry. We showed that inter-capsomer distances, governed by

338 the connecting arms, can expand or contract by up to 7% (95<sup>th</sup> percentile, range of about 7-9Å in  
339 either direction) from their idealized values, without bias in the magnitude or direction of  
340 capsomer movement (Fig 6). This flexion between capsomers provides the basis for the capsid-  
341 wide variability seen in the diameter analysis.

342 Although dynamics information cannot be conclusively derived from a vitrified  
343 population, each particle may represent a state within an equilibrium of particles in solution.  
344 These states, described for the first time by ISECC, provide a source of experimental capsid  
345 dynamics data that could contribute to whole-capsid molecular dynamics simulations such as  
346 described by Hadden *et al.* in hepatitis B virus(Hadden et al., 2018). We propose a model in  
347 which the HPV capsid is dynamic and in a state of constant flexing. This model is supported by  
348 the composition of stable beta-jellyroll capsomer cores with flexibility stemming from the  
349 connections between these capsomers. The classification of different diameter particles likely  
350 failed because the intercapsomer flexing is global and variable, not by symmetrical coordinated  
351 movements. Thus, even for particles with the same diameter, the capsids have different  
352 configurations due to the flexing between capsomers that creates imperfect icosahedral  
353 symmetry. These elements of heterogeneity include a continuous range of different diameters  
354 due to deviations of capsomer positions from a perfect icosahedral grid, which has likely limited  
355 the resolution attained through whole-capsid refinement.

356 The observed dynamics may be a natural consequence of the architecture of the T=7d  
357 icosahedral capsid that requires L1 to exist in hexavalent and pentavalent environments.  
358 However, there are a multitude of possible benefits to a dynamic capsid that allows reversible  
359 expansion and contraction. This flexing could serve as a defense mechanism to hide or alter  
360 antibody binding sites, inhibiting recognition and preventing binding and neutralization. Capsid



361 flexibility also has the potential to make HPV more resilient to environmental factors such as pH,  
362 temperature, or desiccation. Mechanistically, dynamics are certainly necessary for the  
363 conformational changes that are known to occur during host cell entry. Lastly, in the final stages  
364 of the virus life cycle, mature virions pack within the nucleus in a paracrystalline array of  
365 compact capsids that are significantly smaller diameter than when observed after lysis in  
366 suspension. Thus, capsid flexibility is an intriguing and essential factor to papillomavirus  
367 function.

368       Until now, high resolution structures of HPV have been unattainable. By using  
369 subparticle refinement approaches we demonstrated that high resolution is achievable. The new,  
370 more accurate L1 structure revealed L2 density flanking the conserved 306-loop of L1. We also  
371 found that the HPV capsids are globally flexible with capsomers moving as rigid bodies. These  
372 findings provide a framework for continuing structural, biochemical, genetic, and biophysical  
373 studies of HPV. These new observations on capsid flexibilities containing rigid capsomer units  
374 paves the way for design of HPV capsid platforms that can deliver foreign antigenic epitopes  
375 engineered for the development of second-stage vaccines (e.g. L2 insertions into L1 sequences,  
376 Schellenbacher *et al.*, 2009)(Schellenbacher et al., 2009). The design of stable antigenic epitope-  
377 expressing HPV particles will be improved with the cryo EM structural analyses presented in this  
378 study, and lead to *in silico* rational design and selection of stable VLP vectors for vaccines and  
379 gene-therapy deliverables.

380

## 381 **Materials & Methods:**

### 382 **Preparation of Virus**

383 HPV16 quasivirus containing L1 and L2 proteins and encapsidating a CRPV genome  
384 having the SV40 origin of replication was prepared as described previously(Brendle et al., 2010;  
385 Mejia et al., 2006; Pyeon et al., 2005). In brief, HPV16 sheLL plasmid (kindly provided by John  
386 Schiller, NIH) was transfected together with linear CRPV/SV40ori DNA into 293TT cells and  
387 prepared as described previously(Buck, Pastrana, et al., 2005; Buck, Thompson, et al., 2005;  
388 Pastrana et al., 2004). HPV16 was allowed to mature and then pelleted by centrifugation. The  
389 centrifuged pellet was resuspended in 1 M NaCl and 0.2 M Tris (pH 7.4). After CsCl gradient  
390 purification, the lower band was collected. The lower band was then added to CsCl for another  
391 round for ultracentrifugation to separate full from empty virus particles. The lower band was  
392 collected, concentrated, and buffer exchanged using a 100KDa cutoff spin column as described  
393 previously(Guan, Bywaters, Brendle, Lee, Ashley, Makhov, et al., 2015; Guan et al., 2017b).  
394 The concentrated HPV16 quasivirus particles were applied to 300 mesh carbon coated copper  
395 grids and stained with 2% phosphotungstic acid. The sample was analyzed for integrity and  
396 concentration on an FEI Tecnai G2 Spirit BioTwin transmission electron microscope.

### 397 **Cryo-EM Data Collection**

398 The HPV16 sample was assessed for purity and concentration before vitrification for  
399 cryo-EM data collection on the Penn State Titan Krios ([https://www.huck.psu.edu/core-](https://www.huck.psu.edu/core-facilities/cryo-electron-microscopy-facility/instrumentation/fei-titan-krios)  
400 [facilities/cryo-electron-microscopy-facility/instrumentation/fei-titan-krios](https://www.huck.psu.edu/core-facilities/cryo-electron-microscopy-facility/instrumentation/fei-titan-krios)). 3.5 microliters of the  
401 purified virus sample was pipetted onto a glow-discharged R2/1 Quantifoil grid (Quantifoil  
402 Micro Tools GmbH, Jena, Germany), blotted for 2.5 seconds, and plunge-froze in liquid ethane  
403 using a Vitrobot Mark IV (Thermo Fisher, USA). Vitrified grids were imaged with the use of a  
404 Titan Krios G3 (Thermo Fisher, USA) under automated control of the FEI EPU software. An  
405 atlas image was taken at 165x magnification, and suitable areas were selected for imaging on the

406 FEI Falcon 3EC direct electron detector. The microscope was operated at 300 kV with a 70  $\mu\text{m}$   
407 condenser aperture and a 100  $\mu\text{m}$  objective aperture. Magnification was set at 59,000x yielding a  
408 calibrated pixel size of 1.1  $\text{\AA}$ . Four, nonoverlapping exposures were acquired per each 2- $\mu\text{m}$ -  
409 diameter hole of the grid with the beam in parallel mode, for an overall collection of 10,143  
410 micrographs. The total dose per exposure was set to 60  $\text{e}^-/\text{\AA}^2$  (Supp. Table 1).

### 411 **Icosahedral Refinement**

412 Icosahedral refinement was performed in cryoSPARC(Punjani et al., 2017). The  
413 micrographs underwent full frame motion correction and CTF estimation (CTFFIND4)(Rohou &  
414 Grigorieff, 2015). Micrographs were curated and sorted to reject micrographs with crystalline  
415 ice. Particles were picked using 2D templates from 840 particles. Local motion correction was  
416 performed on the particle stack and the CTF estimated micrographs. The particles went into a  
417 homogenous refinement. The final resolution was determined by gold standard FSC threshold of  
418 0.143.

### 419 **Icosahedral Subparticle Extraction and Correlated Classification**

420 ISECC\_subparticle\_extract was used after icosahedral refinement to divide each particle  
421 image into subparticles. Both hexavalent and pentavalent capsomer subparticle were separately  
422 created. An initial model was made for each subparticle type using relion\_reconstruct with  
423 10,000 subparticles(Scheres, 2012). The subparticles were then processed in RELION  
424 v3.1(Scheres, 2012).

### 425 **Local Subparticle Refinement**

426 Pentavalent subparticles were locally refined with C5 symmetry whereas hexavalent C1  
427 was used to refine the pentavalent subparticles. Each subparticle dataset was refined with a

428 spherical mask of 200Å applied to focus on the capsomer and adjoining arms. The final  
429 resolutions were determined by gold standard FSC with a threshold of 0.143 in RELION post-  
430 process. Local resolution maps were generated using RELIONs own software.

### 431 **Icosahedral recombined map**

432 Postprocessed subparticle maps were recombined into a complete capsid using  
433 ISECC\_recombine. This procedure is similar to the recombination process for subparticles in Block  
434 Based Reconstruction and LocalRec (Abrishami et al., 2020; Ilca et al., 2015; Zhu et al., 2018).

435 Briefly, ISECC\_recombine loads the subparticle maps into a numpy array and both shifts and  
436 rotates the maps to their locations in an idealized icosahedron, using regular grid interpolation in  
437 real space. This interpolation scheme allows merging of the subparticle-refined models into a single  
438 asymmetric unit.

### 439 **Model Building**

440 The previously solved L1 structure (PDB: 5KEP) was used to initiate the build(Guan et  
441 al., 2017b).

442 The model was visually inspected and adjusted during iterative refinement before a final  
443 validation(Adams et al., 2010; Emsley et al., 2010). The L1 protein structure from HPV16 (PDB:  
444 5KEP) was used as an initial model. The asymmetric unit PDB was used to create a protein  
445 structure for the pentavalent and hexavalent capsomers. The hexavalent capsomer was made  
446 from chains B-F of the existing PDB and the pentavalent capsomer model was made from 5  
447 copies of chain A from the asymmetric unit. These models were fit into the electron density map  
448 of the pentavalent and hexavalent capsomers independently in Chimera(Pettersen et al., 2004).  
449 The protein structure of L1 was then refined in real space against the cryo-EM electron density

450 map in Phenix with geometry and secondary structural restraints(Adams et al., 2010). The  
451 structure was visually inspected and manually refined in Coot and validated using MolProbity(V.  
452 B. Chen et al., 2010; Emsley et al., 2010). (Supp. Table 1) The protein structures RMSD values  
453 were calculated using MatchMaker in Chimera(Pettersen et al., 2004).

#### 454 **Icosahedral Subparticle Extraction & Correlated Classification (ISECC)**

455 ISECC is a Python-based subparticle extraction package inspired by localized  
456 reconstruction and block-based reconstruction, compatible with RELION 3.1(Ilca et al.,  
457 2015)(Zhu et al., 2018). This allows the user to take advantage of higher order aberration  
458 correction within the updated RELION CtfRefine pipeline.

459 Subparticles are generated according to the following parameters: --vector (atomic  
460 coordinate, in angstroms, for the subparticle center), --roi (region of interest: fivefold, threefold,  
461 twofold, or fullexpand), --subpart\_box (box size for the subparticle images, in pixels), --  
462 supersym (symmetry of the whole particle: I1 or I2).

463 ISECC introduces several new metadata labels to the RELION 3.1 star file to enable  
464 correlated analysis of subparticles after local refinement or classification. For the idealized  
465 icosahedron, each vertex is given a designation, rlnCustomVertexGroup, containing the  
466 symmetry axis and an integer (e.g., 5f01) (SFig 4). If the chosen subparticle is off a strict  
467 symmetry axis, rlnCustomVertexGroup is defined according to the nearest three symmetry axes,  
468 e.g., 5f07.3f14.2f20. Given that each symmetry axis has multiple associated subparticles (5 per  
469 fivefold, etc.), each subparticle is additionally given a rotational specifier (a-e, a-c, or a-b),  
470 ordered anti-clockwise about the local symmetry axis. As such, the complete  
471 rlnCustomVertexGroup specifier for an off-axis subparticle takes a form such as

472 5f07e.3f14c.2f20a. This allows grouped analysis of, for example, all five subparticles belonging  
473 to local vertex 5f07 for a given viral particle.

474 Metadata label `rlnCustomOriginXYZAngstWrtParticleCenter` contains information on the  
475 icosahedrally refined offset of each subparticle in X,Y,Z with respect to the whole particle  
476 center. `rlnCustomRelativePose` contains the relative pose of the subparticle with respect to the  
477 icosahedrally refined orientation. `rlnCustomRelativePose` is stored in quaternion format rather  
478 than the standard RELION Euler angles, `rlnAngleRot`, `rlnAngleTilt`, `rlnAnglePsi`.

### 479 **Local Refinement of Pentavalent and Hexavalent Capsomers**

480 Pentavalent and hexavalent capsomers were extracted in ISECC using the following  
481 commands, respectively:

482 `[--vector 0 136 220 --roi fivefold --supersym I1 --subpart_box 300]`

483 and,

484 `[--roi fullexpand --supersym I1 --subpart_box 300 --vector 42 42 259 --batchsize 9000]`

485 Capsomers were locally refined in RELION 3.1 using the following commands:

486 `[`which relion_refine_mpi` --o Refine3D/job036/run --auto_refine --split_random_halves`  
487 `--i fivefold_subparticles/fivefold_20200114_1026/fivefold_subpart_PRIOR.star --ref`  
488 `fivefold_subparticles/fivefold_20200114_1026/fivefold_initialmodel_c5.mrc --`  
489 `firstiter_cc --ini_high 20 --dont_combine_weights_via_disc --scratch_dir`  
490 `/scratch/sxh739/ --pool 100 --pad 2 --ctf --ctf_corrected_ref --particle_diameter 200 --`  
491 `flatten_solvent --zero_mask --oversampling 1 --healpix_order 5 --`  
492 `auto_local_healpix_order 5 --offset_range 3 --offset_step 2 --sym C5 --`

493 low\_resol\_join\_halves 40 --norm --scale --j 1 --gpu "" --dont\_check\_norm --sigma\_ang  
494 1.5 --pipeline\_control Refine3D/job036/]

495 and,

496 [ `which relion\_refine\_mpi` --o Refine3D/job040/run --auto\_refine --split\_random\_halves  
497 --i fullexpand\_subparticles/fullexpand\_20200123\_1329/fullexpand\_subpart\_PRIOR.star  
498 --ref  
499 fullexpand\_subparticles/fullexpand\_20200123\_1329/fullexpand\_initialmodel\_c1.mrc --  
500 firstiter\_cc --ini\_high 20 --dont\_combine\_weights\_via\_disc --scratch\_dir  
501 /scratch/sxh739/ --pool 100 --pad 2 --ctf --ctf\_corrected\_ref --particle\_diameter 200 --  
502 flatten\_solvent --zero\_mask --oversampling 1 --healpix\_order 5 --  
503 auto\_local\_healpix\_order 5 --offset\_range 3 --offset\_step 2 --sym C1 --  
504 low\_resol\_join\_halves 40 --norm --scale --j 1 --gpu "" --dont\_check\_norm --sigma\_ang  
505 1.5 --pipeline\_control Refine3D/job040/]

## 506 **Correlation of locally refined capsomers coordinates**

507 Correlational analysis was performed using the ISECC\_local\_motions script. Briefly, this  
508 parses the locally refined pentavalent and hexavalent capsomer star files to evaluate local deltas  
509 for subparticle origins and poses as compared to their idealized, icosahedrally derived, starting  
510 values. Coupled with the new metadata identifiers, rlnCustomVertexGroup and  
511 rlnCustomOriginXYZAngstWrtParticleCenter, this identifies deviation of each capsomer from  
512 idealized icosahedral symmetry on a per-particle basis.

513 Deviation in particle diameter was calculated for all particles that satisfied selection  
514 criteria, namely, a pair of pentavalent capsomers within +/- 5% (12.9Å) of the central plane

515 ( $Z=0$ ), where  $z_{\max}$  corresponded to the particle radius as defined by the distance between the  
516 center of capsomer and the particle center. This geometry minimizes contribution to distance  
517 along the Z-axis, which unlike X or Y cannot be locally refined. These capsomers are easily  
518 identified using the Z parameter within `rlnCustomOriginXYZAngstWrtParticleCenter`. The  
519 locally refined XY distance between polar opposite pentavalent capsomers was calculated for the  
520 50,224 qualifying particles and compared to the Z-flattened icosahedrally-derived distance,  
521 producing a difference ratio. It is important to note that this analysis cannot capture the Z-  
522 component of any diameter deviation, necessitating the selection criteria described above.

523 Capsomer distance analysis was conducted on all particles with a hexavalent subparticle  
524 center within 25Å x,y distance of the whole particle center. Capsomers with a potential  
525 doppelganger within 15Å x,y distance on the opposite face of the capsid were excluded from this  
526 analysis to avoid the risk of subparticle identity swap during local refinement. Neighboring  
527 subparticles were then identified using the `rlnCustomVertexGroup` parameter, allowing the  
528 geometric relationships between capsomers to be distinguished (see the four relationships listed  
529 in Fig 6b). The locally-refined x,y distance for each pair of qualifying capsomers (A:F 38,238,  
530 B:Null 77,566, C:D 75,468, E:E 42,228) was divided by the icosahedrally-derived x,y distance  
531 (dropping the z coordinate) to produce an in-plane ratio corresponding to contraction or  
532 expansion along the given axis.

533



534 **Acknowledgements**

535 This work was supported in part by the J. Gittlen Memorial Golf Tournament and the  
536 Pennsylvania Department of Health CURE funds.

537 **Competing Interests**

538 The authors declare no competing interests.

539

540 **Author Contributions**

541 DJG, SRH, NDC, and SLH conceived the study. SS expressed and purified virus. CMB vitrified  
542 the sample and collected cryo EM data. DJG designed and developed the custom software. SRH  
543 solved the structures and built the models. DJG, SRH, and SLH interpreted the data. DJG, SRH,  
544 NDC, and SLH wrote the manuscript.

545

546 **Data and Code Availability**

547 The HPV structures of the 3.1Å recombined map (EMDB: XXXX), pentavalent capsomer map  
548 (EMDB: XXXX), hexavalent capsomer map (EMDB: XXXX), and 4.4Å icosahedral refinement  
549 (EMDB: XXXX) have been deposited in the EM database (<http://www.emdatabank.org/>).  
550 Coordinates for the atomic model of the asymmetric unit of HPV16 L1 proteins (PDB: XXXX)  
551 have been deposited in the protein data bank (<https://www.rcsb.org/>). ISECC, our custom  
552 software for subparticle extraction and correlated classification, is available on GitHub  
553 (<https://github.com/goetschius/isecc>)

554

555 **References**

- 556 Abrishami, V., Ilca, S. L., Gomez-Blanco, J., Rissanen, I., de la Rosa-Trevín, J. M., Reddy, V. S., Carazo, J.-  
557 M., & Huiskonen, J. T. (2020). Localized reconstruction in Scipion expedites the analysis of  
558 symmetry mismatches in cryo-EM data. *Progress in Biophysics and Molecular Biology*.  
559 <https://doi.org/10.1016/j.pbiomolbio.2020.05.004>
- 560 Adams, P. D., Afonine, P. V., Bunkóczi, G., Chen, V. B., Davis, I. W., Echols, N., Headd, J. J., Hung, L.-W.,  
561 Kapral, G. J., Grosse-Kunstleve, R. W., McCoy, A. J., Moriarty, N. W., Oeffner, R., Read, R. J.,  
562 Richardson, D. C., Richardson, J. S., Terwilliger, T. C., & Zwart, P. H. (2010). PHENIX: A  
563 comprehensive Python-based system for macromolecular structure solution. *Acta*  
564 *Crystallographica. Section D, Biological Crystallography*, 66(Pt 2), 213–221.  
565 <https://doi.org/10.1107/S0907444909052925>
- 566 Bai, X., McMullan, G., & Scheres, S. H. W. (2015). How cryo-EM is revolutionizing structural biology.  
567 *Trends in Biochemical Sciences*, 40(1), 49–57. <https://doi.org/10.1016/j.tibs.2014.10.005>
- 568 Baker, T. S., Newcomb, W. W., Olson, N. H., Cowser, L. M., Olson, C., & Brown, J. C. (1991). Structures  
569 of bovine and human papillomaviruses. Analysis by cryoelectron microscopy and three-  
570 dimensional image reconstruction. *Biophysical Journal*, 60(6), 1445–1456.  
571 [https://doi.org/10.1016/S0006-3495\(91\)82181-6](https://doi.org/10.1016/S0006-3495(91)82181-6)
- 572 Bosch, F. X., Manos, M. M., Munoz, N., Sherman, M., Jansen, A. M., Peto, J., Schiffman, M. H., Moreno, V.,  
573 Kurman, R., Shan, K. V., & International Biological Study on Cervical Cancer (IBSCC) Study  
574 Group. (1995). Prevalence of Human Papillomavirus in Cervical Cancer: A Worldwide  
575 Perspective. *JNCI Journal of the National Cancer Institute*, 87(11), 796–802.  
576 <https://doi.org/10.1093/jnci/87.11.796>
- 577 Brendle, S. A., Culp, T. D., Broutian, T. R., & Christensen, N. D. (2010). Binding and neutralization  
578 characteristics of a panel of monoclonal antibodies to human papillomavirus 58. *Journal of*  
579 *General Virology*, 91(7), 1834–1839. <https://doi.org/10.1099/vir.0.017228-0>

- 580 Bronnimann, M. P., Chapman, J. A., Park, C. K., & Campos, S. K. (2013). A transmembrane domain and  
581 GxxxG motifs within L2 are essential for papillomavirus infection. *Journal of Virology*, *87*(1),  
582 464–473. <https://doi.org/10.1128/JVI.01539-12>
- 583 Buck, C. B., Cheng, N., Thompson, C. D., Lowy, D. R., Steven, A. C., Schiller, J. T., & Trus, B. L. (2008a).  
584 Arrangement of L2 within the papillomavirus capsid. *Journal of Virology*, *82*(11), 5190–  
585 5197. <https://doi.org/10.1128/JVI.02726-07>
- 586 Buck, C. B., Cheng, N., Thompson, C. D., Lowy, D. R., Steven, A. C., Schiller, J. T., & Trus, B. L. (2008b).  
587 Arrangement of L2 within the papillomavirus capsid. *Journal of Virology*, *82*(11), 5190–  
588 5197. <https://doi.org/10.1128/JVI.02726-07>
- 589 Buck, C. B., Pastrana, D. V., Lowy, D. R., & Schiller, J. T. (2005). Generation of HPV pseudovirions  
590 using transfection and their use in neutralization assays. *Methods in Molecular Medicine*,  
591 *119*, 445–462. <https://doi.org/10.1385/1-59259-982-6:445>
- 592 Buck, C. B., Thompson, C. D., Pang, Y.-Y. S., Lowy, D. R., & Schiller, J. T. (2005). Maturation of  
593 papillomavirus capsids. *Journal of Virology*, *79*(5), 2839–2846.  
594 <https://doi.org/10.1128/JVI.79.5.2839-2846.2005>
- 595 Cardone, G., Moyer, A. L., Cheng, N., Thompson, C. D., Dvoretzky, I., Lowy, D. R., Schiller, J. T., Steven,  
596 A. C., Buck, C. B., & Trus, B. L. (2014). Maturation of the Human Papillomavirus 16 Capsid.  
597 *MBio*, *5*(4), e01104-14. <https://doi.org/10.1128/mBio.01104-14>
- 598 Chen, V. B., Arendall, W. B., Headd, J. J., Keedy, D. A., Immormino, R. M., Kapral, G. J., Murray, L. W.,  
599 Richardson, J. S., & Richardson, D. C. (2010). MolProbity: All-atom structure validation for  
600 macromolecular crystallography. *Acta Crystallographica. Section D, Biological*  
601 *Crystallography*, *66*(Pt 1), 12–21. <https://doi.org/10.1107/S09074444909042073>
- 602 Chen, X. S., Garcea, R. L., Goldberg, I., Casini, G., & Harrison, S. C. (2000). Structure of small virus-like  
603 particles assembled from the L1 protein of human papillomavirus 16. *Molecular Cell*, *5*(3),  
604 557–567. [https://doi.org/10.1016/s1097-2765\(00\)80449-9](https://doi.org/10.1016/s1097-2765(00)80449-9)

- 605 Christensen, N. D. (2005). Cottontail rabbit papillomavirus (CRPV) model system to test antiviral  
606 and immunotherapeutic strategies. *Antiviral Chemistry & Chemotherapy*, 16(6), 355–362.  
607 <https://doi.org/10.1177/095632020501600602>
- 608 Crow, J. M. (2012). HPV: The global burden. *Nature*, 488(7413), S2-3.  
609 <https://doi.org/10.1038/488S2a>
- 610 Dasgupta, J., Bienkowska-Haba, M., Ortega, M. E., Patel, H. D., Bodevin, S., Spillmann, D., Bishop, B.,  
611 Sapp, M., & Chen, X. S. (2011). Structural basis of oligosaccharide receptor recognition by  
612 human papillomavirus. *The Journal of Biological Chemistry*, 286(4), 2617–2624.  
613 <https://doi.org/10.1074/jbc.M110.160184>
- 614 Doorbar, J., & Gallimore, P. H. (1987). Identification of proteins encoded by the L1 and L2 open  
615 reading frames of human papillomavirus 1a. *Journal of Virology*, 61(9), 2793–2799.
- 616 Emsley, P., Lohkamp, B., Scott, W. G., & Cowtan, K. (2010). Features and development of Coot. *Acta*  
617 *Crystallographica. Section D, Biological Crystallography*, 66(Pt 4), 486–501.  
618 <https://doi.org/10.1107/S0907444910007493>
- 619 Finch, J. T., & Klug, A. (1965). The structure of viruses of the papilloma-polyoma type 3. Structure of  
620 rabbit papilloma virus, with an appendix on the topography of contrast in negative-staining  
621 for electron-microscopy. *Journal of Molecular Biology*, 13(1), 1–12.  
622 [https://doi.org/10.1016/s0022-2836\(65\)80075-4](https://doi.org/10.1016/s0022-2836(65)80075-4)
- 623 Goetschius, D. J., Lee, H., & Hafenstein, S. (2019). CryoEM reconstruction approaches to resolve  
624 asymmetric features. *Advances in Virus Research*, 105, 73–91.  
625 <https://doi.org/10.1016/bs.aivir.2019.07.007>
- 626 Goetschius, D. J., Parrish, C. R., & Hafenstein, S. (2019). Asymmetry in icosahedral viruses. *Current*  
627 *Opinion in Virology*, 36, 67–73. <https://doi.org/10.1016/j.coviro.2019.05.006>
- 628 Guan, J., Bywaters, S. M., Brendle, S. A., Ashley, R. E., Makhov, A. M., Conway, J. F., Christensen, N. D.,  
629 & Hafenstein, S. (2017a). High-Resolution Structure Analysis of Antibody V5 and U4

- 630 Conformational Epitopes on Human Papillomavirus 16. *Viruses*, 9(12).  
631 <https://doi.org/10.3390/v9120374>
- 632 Guan, J., Bywaters, S. M., Brendle, S. A., Ashley, R. E., Makhov, A. M., Conway, J. F., Christensen, N. D.,  
633 & Hafenstein, S. (2017b). Cryoelectron Microscopy Maps of Human Papillomavirus 16  
634 Reveal L2 Densities and Heparin Binding Site. *Structure*, 25(2), 253–263.  
635 <https://doi.org/10.1016/j.str.2016.12.001>
- 636 Guan, J., Bywaters, S. M., Brendle, S. A., Lee, H., Ashley, R. E., Christensen, N. D., & Hafenstein, S.  
637 (2015). The U4 Antibody Epitope on Human Papillomavirus 16 Identified by Cryo-electron  
638 Microscopy. *Journal of Virology*, 89(23), 12108–12117. [https://doi.org/10.1128/JVI.02020-](https://doi.org/10.1128/JVI.02020-15)  
639 15
- 640 Guan, J., Bywaters, S. M., Brendle, S. A., Lee, H., Ashley, R. E., Makhov, A. M., Conway, J. F.,  
641 Christensen, N. D., & Hafenstein, S. (2015). Structural comparison of four different  
642 antibodies interacting with human papillomavirus 16 and mechanisms of neutralization.  
643 *Virology*, 483, 253–263. <https://doi.org/10.1016/j.virol.2015.04.016>
- 644 Hadden, J. A., Perilla, J. R., Schlicksup, C. J., Venkatakrisnan, B., Zlotnick, A., & Schulten, K. (2018).  
645 All-atom molecular dynamics of the HBV capsid reveals insights into biological function and  
646 cryo-EM resolution limits. *ELife*, 7. <https://doi.org/10.7554/eLife.32478>
- 647 Hernandez, B. Y., Ton, T., Shvetsov, Y. B., Goodman, M. T., & Zhu, X. (2012). Human papillomavirus  
648 (HPV) L1 and L1-L2 virus-like particle-based multiplex assays for measurement of HPV  
649 virion antibodies. *Clinical and Vaccine Immunology: CVI*, 19(9), 1348–1352.  
650 <https://doi.org/10.1128/CVI.00191-12>
- 651 Ilca, S. L., Kotecha, A., Sun, X., Poranen, M. M., Stuart, D. I., & Huiskonen, J. T. (2015). Localized  
652 reconstruction of subunits from electron cryomicroscopy images of macromolecular  
653 complexes. *Nature Communications*, 6, 8843.

- 654 Kirnbauer, R., Booy, F., Cheng, N., Lowy, D. R., & Schiller, J. T. (1992). Papillomavirus L1 major capsid  
655 protein self-assembles into virus-like particles that are highly immunogenic. *Proceedings of*  
656 *the National Academy of Sciences of the United States of America*, 89(24), 12180–12184.  
657 <https://doi.org/10.1073/pnas.89.24.12180>
- 658 Kirnbauer, R., Taub, J., Greenstone, H., Roden, R., Dürst, M., Gissmann, L., Lowy, D. R., & Schiller, J. T.  
659 (1993). Efficient self-assembly of human papillomavirus type 16 L1 and L1-L2 into virus-  
660 like particles. *Journal of Virology*, 67(12), 6929–6936.
- 661 Lee, H., Brendle, S. A., Bywaters, S. M., Guan, J., Ashley, R. E., Yoder, J. D., Makhov, A. M., Conway, J. F.,  
662 Christensen, N. D., & Hafenstein, S. (2015). A Cryo-Electron Microscopy Study Identifies the  
663 Complete H16.V5 Epitope and Reveals Global Conformational Changes Initiated by Binding  
664 of the Neutralizing Antibody Fragment. *Journal of Virology*, 89(2), 1428–1438.  
665 <https://doi.org/10.1128/JVI.02898-14>
- 666 Lewis, A., Kang, R., Levine, A., & Maghami, E. (2015). The New Face of Head and Neck Cancer: The  
667 HPV Epidemic. *Oncology (Williston Park, N.Y.)*, 29(9), 616–626.
- 668 Lowe, J., Panda, D., Rose, S., Jensen, T., Hughes, W. A., Tso, F. Y., & Angeletti, P. C. (2008).  
669 Evolutionary and structural analyses of alpha-papillomavirus capsid proteins yields novel  
670 insights into L2 structure and interaction with L1. *Virology Journal*, 5, 150.  
671 <https://doi.org/10.1186/1743-422X-5-150>
- 672 Lydiatt, W. M., Patel, S. G., O'Sullivan, B., Brandwein, M. S., Ridge, J. A., Migliacci, J. C., Loomis, A. M., &  
673 Shah, J. P. (2017). Head and Neck cancers-major changes in the American Joint Committee  
674 on cancer eighth edition cancer staging manual. *CA: A Cancer Journal for Clinicians*, 67(2),  
675 122–137. <https://doi.org/10.3322/caac.21389>
- 676 Mejia, A. F., Culp, T. D., Cladel, N. M., Balogh, K. K., Budgeon, L. R., Buck, C. B., & Christensen, N. D.  
677 (2006). Preclinical model to test human papillomavirus virus (HPV) capsid vaccines in vivo

678 using infectious HPV/cottontail rabbit papillomavirus chimeric papillomavirus particles.  
679 *Journal of Virology*, 80(24), 12393–12397. <https://doi.org/10.1128/JVI.01583-06>

680 Okun, M. M., Day, P. M., Greenstone, H. L., Booy, F. P., Lowy, D. R., Schiller, J. T., & Roden, R. B. S.  
681 (2001). L1 Interaction Domains of Papillomavirus L2 Necessary for Viral Genome  
682 Encapsidation. *Journal of Virology*, 75(9), 4332–4342.  
683 <https://doi.org/10.1128/JVI.75.9.4332-4342.2001>

684 Panatto, D., Amicizia, D., Bragazzi, N. L., Rizzitelli, E., Tramalloni, D., Valle, I., & Gasparini, R. (2015).  
685 Human Papillomavirus Vaccine: State of the Art and Future Perspectives. *Advances in*  
686 *Protein Chemistry and Structural Biology*, 101, 231–322.  
687 <https://doi.org/10.1016/bs.apcsb.2015.08.004>

688 Pastrana, D. V., Buck, C. B., Pang, Y.-Y. S., Thompson, C. D., Castle, P. E., FitzGerald, P. C., Krüger Kjaer,  
689 S., Lowy, D. R., & Schiller, J. T. (2004). Reactivity of human sera in a sensitive, high-  
690 throughput pseudovirus-based papillomavirus neutralization assay for HPV16 and HPV18.  
691 *Virology*, 321(2), 205–216. <https://doi.org/10.1016/j.virol.2003.12.027>

692 Pettersen, E. F., Goddard, T. D., Huang, C. C., Couch, G. S., Greenblatt, D. M., Meng, E. C., & Ferrin, T. E.  
693 (2004). UCSF Chimera—A visualization system for exploratory research and analysis.  
694 *Journal of Computational Chemistry*, 25(13), 1605–1612. <https://doi.org/10.1002/jcc.20084>

695 Punjani, A., Rubinstein, J. L., Fleet, D. J., & Brubaker, M. A. (2017). cryoSPARC: Algorithms for rapid  
696 unsupervised cryo-EM structure determination. *Nature Methods*, 14(3), 290–296.  
697 <https://doi.org/10.1038/nmeth.4169>

698 Pyeon, D., Lambert, P. F., & Ahlquist, P. (2005). Production of infectious human papillomavirus  
699 independently of viral replication and epithelial cell differentiation. *Proceedings of the*  
700 *National Academy of Sciences of the United States of America*, 102(26), 9311–9316.  
701 <https://doi.org/10.1073/pnas.0504020102>

- 702 Raff, A. B., Woodham, A. W., Raff, L. M., Skeate, J. G., Yan, L., Da Silva, D. M., Schelhaas, M., & Kast, W.  
703 M. (2013). The evolving field of human papillomavirus receptor research: A review of  
704 binding and entry. *Journal of Virology*, *87*(11), 6062–6072.  
705 <https://doi.org/10.1128/JVI.00330-13>
- 706 Rohou, A., & Grigorieff, N. (2015). CTFIND4: Fast and accurate defocus estimation from electron  
707 micrographs. *Journal of Structural Biology*, *192*(2), 216–221.  
708 <https://doi.org/10.1016/j.jsb.2015.08.008>
- 709 Sapp, M., Fligge, C., Petzak, I., Harris, J. R., & Streeck, R. E. (1998). Papillomavirus assembly requires  
710 trimerization of the major capsid protein by disulfides between two highly conserved  
711 cysteines. *Journal of Virology*, *72*(7), 6186–6189.
- 712 Schellenbacher, C., Roden, R., & Kirnbauer, R. (2009). Chimeric L1-L2 virus-like particles as  
713 potential broad-spectrum human papillomavirus vaccines. *Journal of Virology*, *83*(19),  
714 10085–10095. <https://doi.org/10.1128/JVI.01088-09>
- 715 Scheres, S. H. W. (2012). RELION: Implementation of a Bayesian approach to cryo-EM structure  
716 determination. *Journal of Structural Biology*, *180*(3), 519–530.  
717 <https://doi.org/10.1016/j.jsb.2012.09.006>
- 718 Trus, B. L., Roden, R. B., Greenstone, H. L., Vrhel, M., Schiller, J. T., & Booy, F. P. (1997). Novel  
719 structural features of bovine papillomavirus capsid revealed by a three-dimensional  
720 reconstruction to 9 Å resolution. *Nature Structural Biology*, *4*(5), 413–420.
- 721 Walboomers, J. M. M., Jacobs, M. V., Manos, M. M., Bosch, F. X., Kummer, J. A., Shah, K. V., Snijders, P. J.  
722 F., Peto, J., Meijer, C. J. L. M., & Muñoz, N. (1999). Human papillomavirus is a necessary  
723 cause of invasive cervical cancer worldwide. *The Journal of Pathology*, *189*(1), 12–19.  
724 [https://doi.org/10.1002/\(SICI\)1096-9896\(199909\)189:1<12::AID-PATH431>3.0.CO;2-F](https://doi.org/10.1002/(SICI)1096-9896(199909)189:1<12::AID-PATH431>3.0.CO;2-F)



- 725 Wolf, M., Garcea, R. L., Grigorieff, N., & Harrison, S. C. (2010). Subunit interactions in bovine  
726 papillomavirus. *Proceedings of the National Academy of Sciences of the United States of*  
727 *America*, 107(14), 6298–6303. <https://doi.org/10.1073/pnas.0914604107>
- 728 Zhu, D., Wang, X., Fang, Q., Etten, J. L. V., Rossmann, M. G., Rao, Z., & Zhang, X. (2018). Pushing the  
729 resolution limit by correcting the Ewald sphere effect in single-particle Cryo-EM  
730 reconstructions. *Nature Communications*, 9(1), 1552. [https://doi.org/10.1038/s41467-018-](https://doi.org/10.1038/s41467-018-04051-9)  
731 [04051-9](https://doi.org/10.1038/s41467-018-04051-9)
- 732 zur Hausen, H. (1991). Human papillomaviruses in the pathogenesis of anogenital cancer. *Virology*,  
733 *184*(1), 9–13. [https://doi.org/10.1016/0042-6822\(91\)90816-t](https://doi.org/10.1016/0042-6822(91)90816-t)

734

735 **Figures**

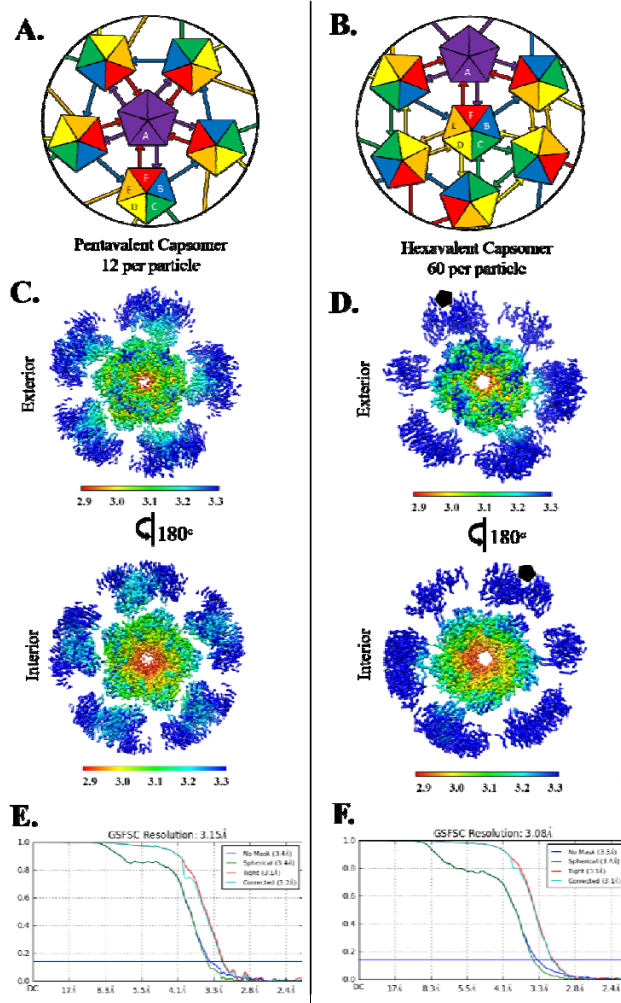

736

737 **Figure 1. Capsomer environments and subparticle refinement.** (A, B) Illustrated graphically  
 738 by cartoons of pentavalent and hexavalent capsomers, the HPV capsid asymmetric unit is made  
 739 up of six L1 chains, labeled chain A-F and colored purple, blue, green, yellow, orange, and red  
 740 respectively. (A) Each A chain of the pentavalent capsomer makes a connection with chain F of  
 741 the neighboring hexavalent capsomer, showing fivefold icosahedral symmetry. The pentavalent  
 742 capsomer is surrounded by single arm connections of chain B to chain E of hexavalent  
 743 capsomers in a counterclockwise ring contribution. (B) Each C chain (green) can be seen  
 744 interacting with another C chain, showing threefold icosahedral symmetry. Each E chain  
 745 (orange) contributes to D chain (yellow), showing twofold symmetry. (C, D) Surface rendered  
 746 subvolumes colored according to local resolution (color key) with exterior views (upper panels)  
 747 and views flipped 180° for interior view (lower panel). Highest resolution (red) in both  
 748 environments is seen at the interior core of the capsomer with resolution diminishing at the  
 749 connecting arms and at the outer edges (C) Pentavalent subvolumes are centered on the fivefold  
 750 icosahedral symmetry axes, whereas a black pentagon identifies the fivefold axis location in the  
 751 hexavalent capsomer (D). (E) Pentavalent capsomer FSC curve to 3.15 Å. (F) Hexavalent  
 752 capsomer FSC curve to 3.08 Å.

753

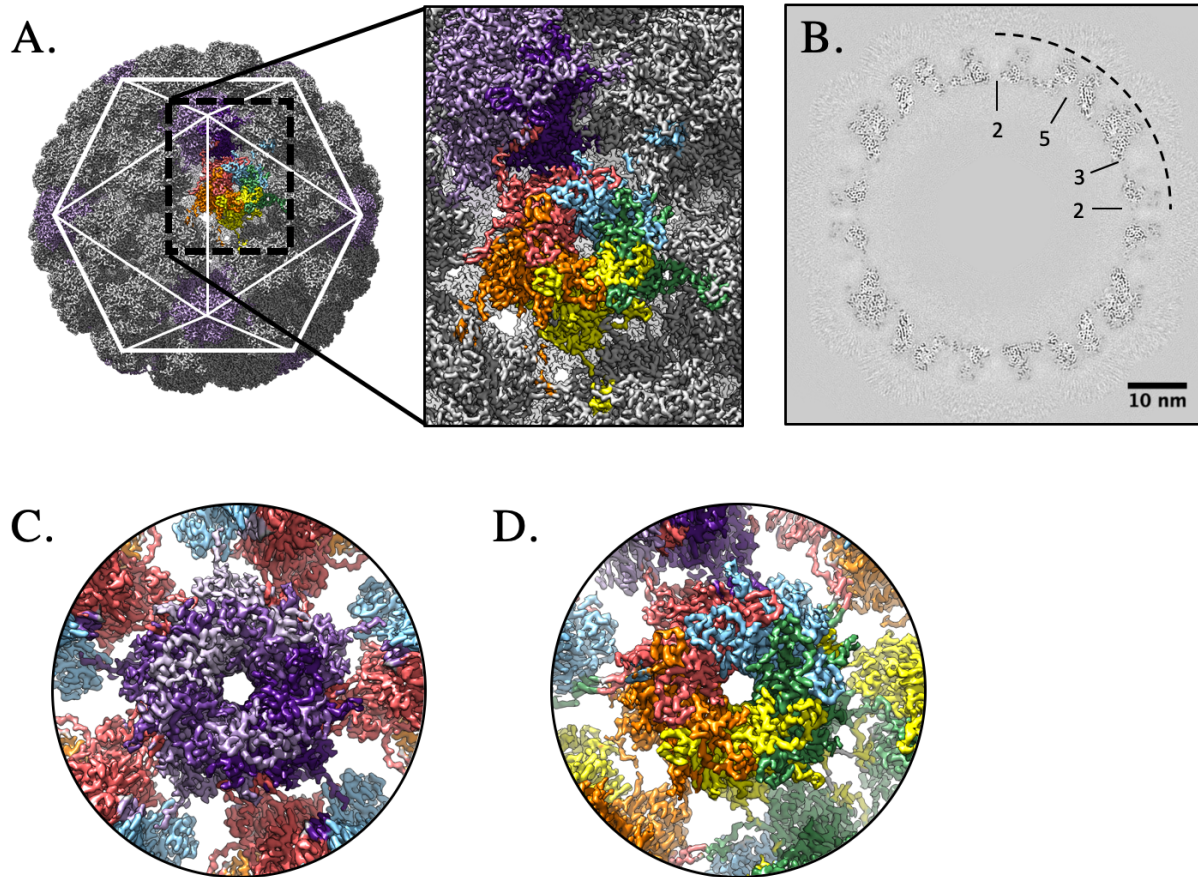

754

755 **Figure 2. High resolution capsid map.** The high resolution subparticle maps were recombined  
756 into a complete capsid (gray, surface rendered) (A), allowing the complete asymmetric unit (A,  
757 inset, color code as in Fig. 1A) to be visualized in the context of the capsid (icosahedral cage).  
758 The high quality of the map is evident in the central section (B) with symmetry axes denoted  
759 (black dotted line) and scale bar. Density for individual L1 chains could be continuously traced  
760 in both the pentavalent (C) (L1 chain A; shades of purple) and hexavalent (D) capsomer maps  
761 (bottom right; L1 chains B-F; blue, green, yellow, orange, red).

762

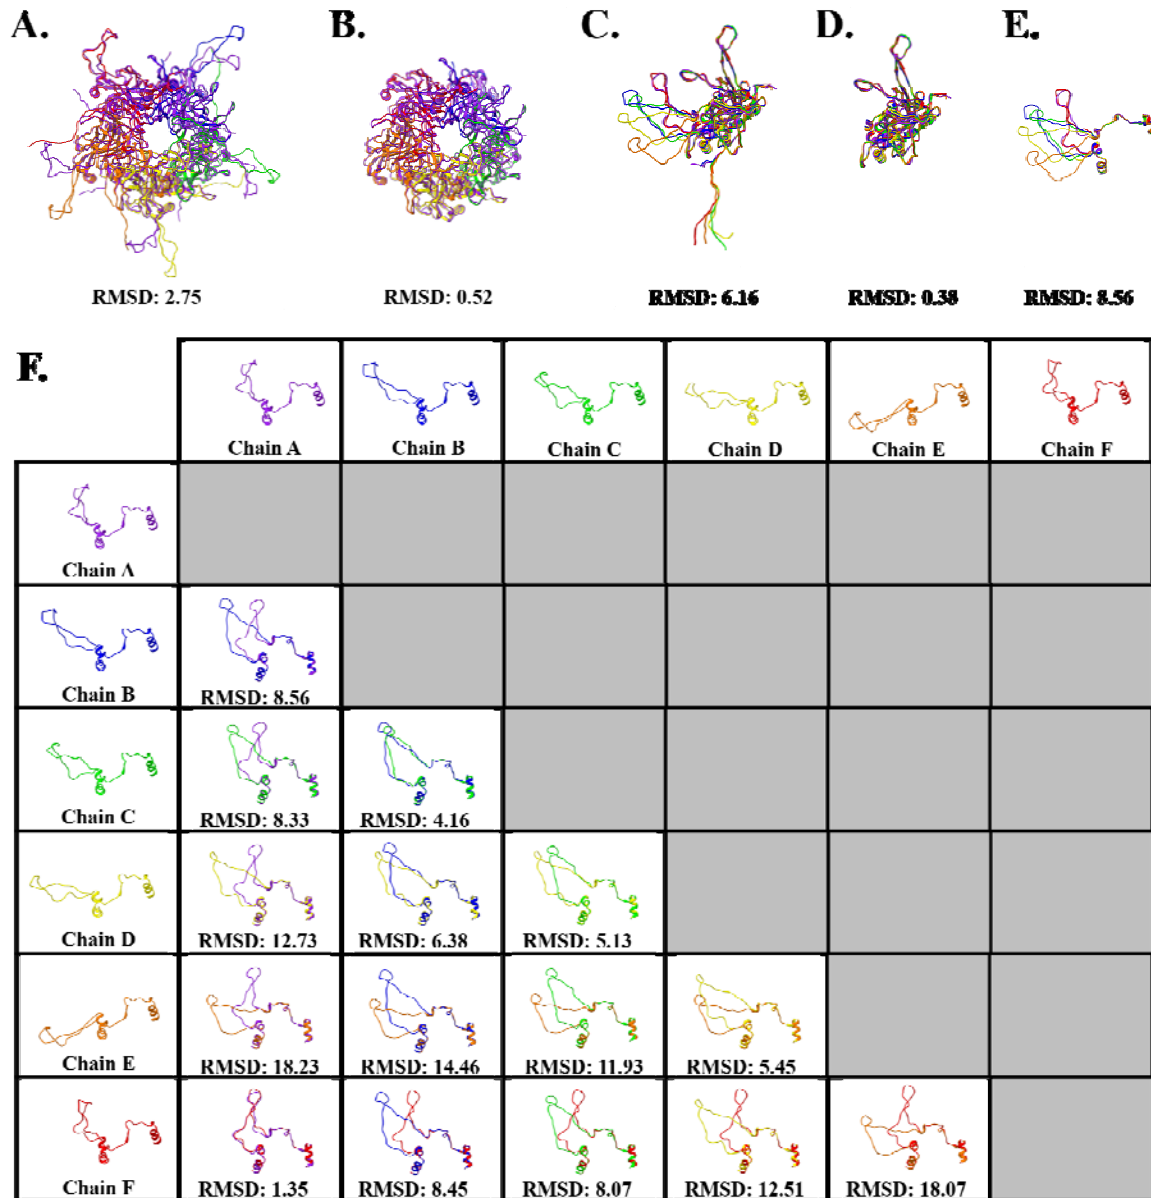

763

764 **Figure 3. Differences in L1 structural conformation.** All RMSD values are given in  
 765 Angstroms. (A) Pentavalent (five A chains, purple) and hexavalent (chain B-F, blue, green,  
 766 yellow, orange, and red) capsomers superimposed with an RMSD of 2.75Å. (B) Structure  
 767 comparison of pentavalent and hexavalent capsomer conformations excluding amino acid side  
 768 chains 402-439 that extend as a connecting arm to the neighboring capsomer, and the N-terminal  
 769 residues 1-23. (C) Structure comparison of the six L1 conformations, making up the asymmetric  
 770 unit chains A-F. (D) Structure comparison of the six L1 conformations, excluding amino acid  
 771 side chains from the connecting arms and the N-terminal residues. (E) Structure comparison of  
 772 the connecting arms of the six different L1 conformations found in the asymmetric unit. The  
 773 flanking secondary structure was included for alignment, depicted as amino acid residues 385-  
 774 472. (F) Pair-wise structure comparison of the six connecting arm conformations and their  
 775 associated RMSD values.

776

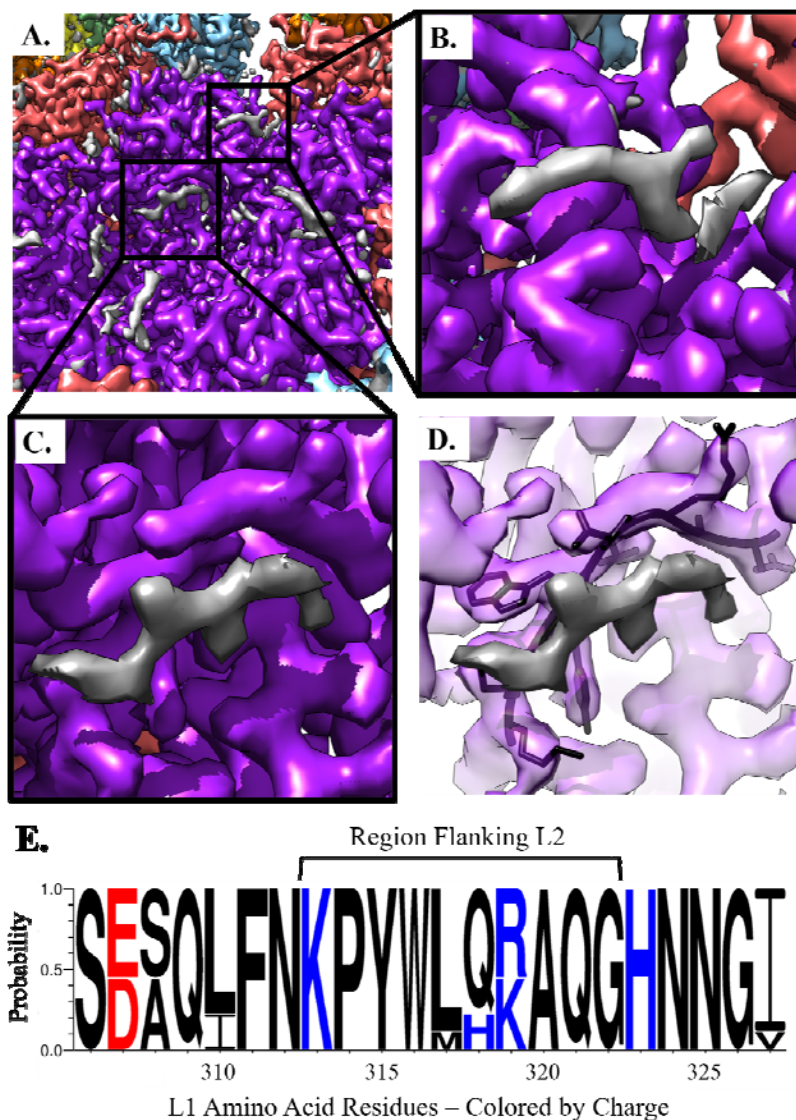

777

778 **Figure 4. Non-L1 Internal Density.** The capsomer density maps are colored within 2Å of the  
779 L1 protein chain and the gray areas are L2 density. (A) The internal capsomer core of  
780 pentavalent capsomer at contour level 2. The gray density is appears as protein-like density with  
781 two distinct areas correlated to each chain of L1 in the capsomer. (B) Zoom in of the fishhook L2  
782 density. (C) Zoom in of internal capsomer density. (D) Same view as C. with L1 transparent, the  
783 residues that are being shown make up the conserved 306-loop, that is seen flanking the area of  
784 L2 density. (E) The plot shows the protein sequence conservation of the loop region Ser306 –  
785 Ile328. Colored by charge with red being acidic, and blue being basic. The internally exposed  
786 region is denoted by a bracket and is found on the interior of the capsomer and adjacent to non-  
787 L1 associated density.

788

789

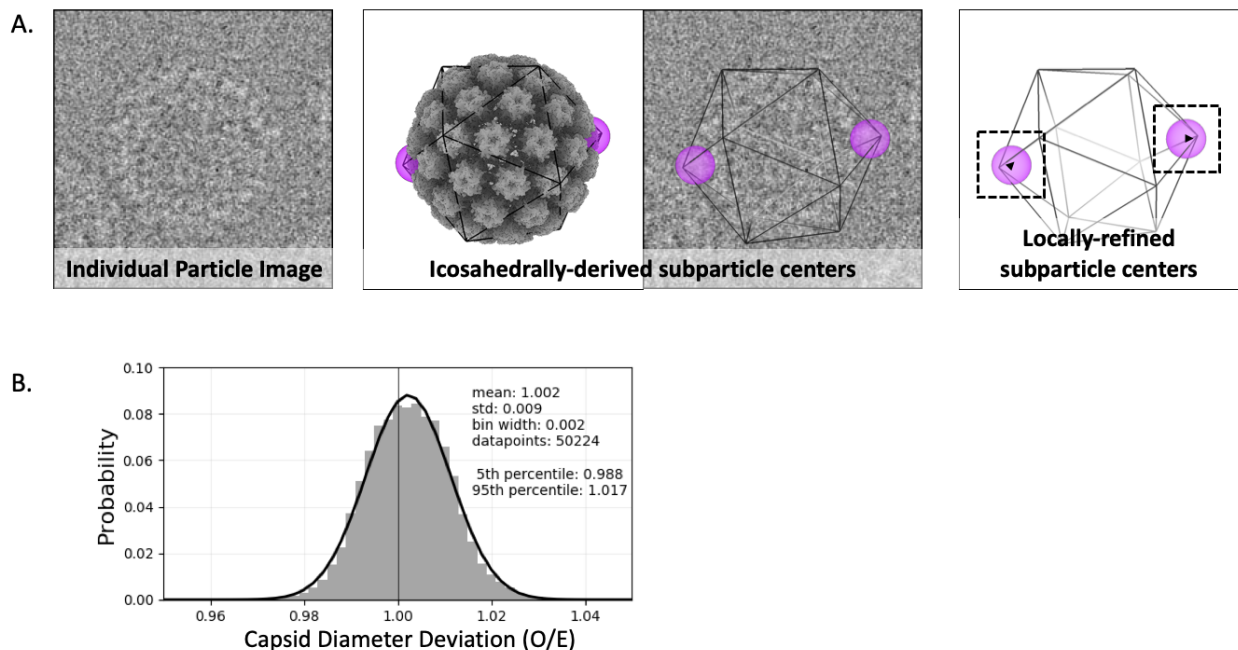

790

791 **Figure 5: Capsid diameters.** (A, left) From a cryo EM micrograph, an example of a particle  
792 oriented with opposing pentavalent capsomers in the  $Z=0$  plane (within a tolerance, see  
793 Methods). (A, center) The same particle also illustrated in a 3D surface rendered model (gray)  
794 and outlined with icosahedral cage (black line) with opposing pentavalent capsomers indicated  
795 (purple spheres). The particle origin and orientation found during icosahedral refinement,  
796 determines the idealized capsomer locations. (A, right) Local subparticle refinement identifies  
797 the actual capsomer centers, which allows calculation of the deviation (black arrowheads) of the  
798 diameter along the given axis from expected values. (B) A gaussian distribution of capsid  
799 diameters (black curve) is evident after pooling all qualifying particles. A standard deviation of  
800 0.9% corresponds to  $\sim 4.6\text{\AA}$ , or 4.2 pixels at a pixel size of  $1.1\text{\AA}$ .

801

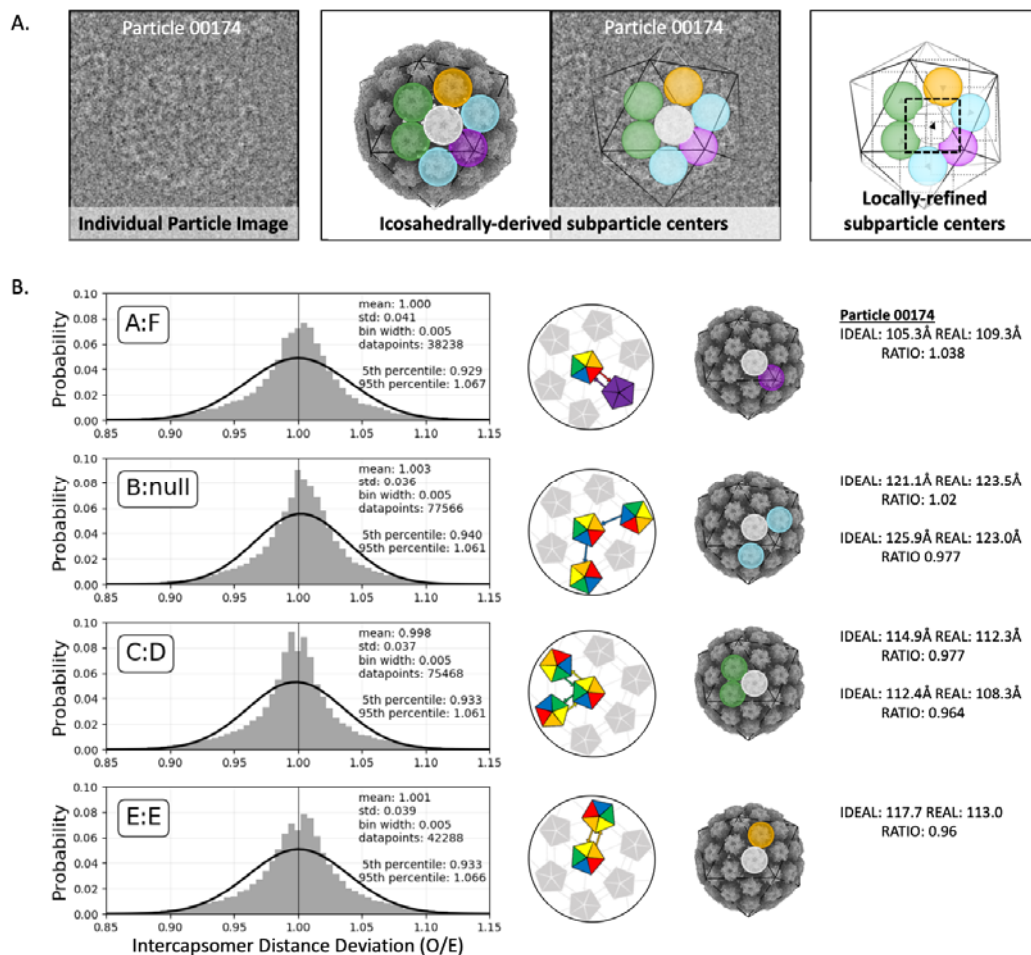

802

803 **Figure 6: Inter-capsomer distances.** (A, left) An example of a particle oriented in one of the  
 804 cryo EM micrographs so that it met the selection criteria (Methods) for capsomer distance  
 805 analysis. (A, center) The same particle also illustrated in a 3D surface rendered model (gray) and  
 806 outlined with icosahedral cage (black line) with a reference capsomer (white sphere) indicated  
 807 centrally in the hexavalent capsomer. Relative to the reference, there are four different arm  
 808 configurations: the hexavalent-pentavalent axis (A:F arm exchange) (purple); the fivefold-  
 809 adjacent hexavalent-hexavalent axis (unidirectional B arm contribution) (blue); the threefold-  
 810 adjacent hexavalent-hexavalent axis (C:D exchange)(green); and the twofold hexavalent-  
 811 hexavalent axis (E:E exchange)(orange). The particle origin and orientation found during  
 812 icosahedral refinement determined the idealized capsomer locations. (A, right) Local subparticle  
 813 refinement found the correct capsomer centers (black arrowhead), which then can be used to  
 814 determine the deviation from the icosahedrally-derived, idealized parameters.

815 (B) Deviation of inter-capsomer distances from idealized values were plotted and the ratios  
 816 corresponded to contraction (values < 1) or expansion (> 1). The four unique axes of arm  
 817 configurations as defined above were plotted. Each axis shows a similar, non-gaussian pattern of  
 818 deviation (gaussian fit, black curve) with a standard deviation of ~4%. Values and schematic for  
 819 the example particle are shown at right.

820 **Supplementary Information**

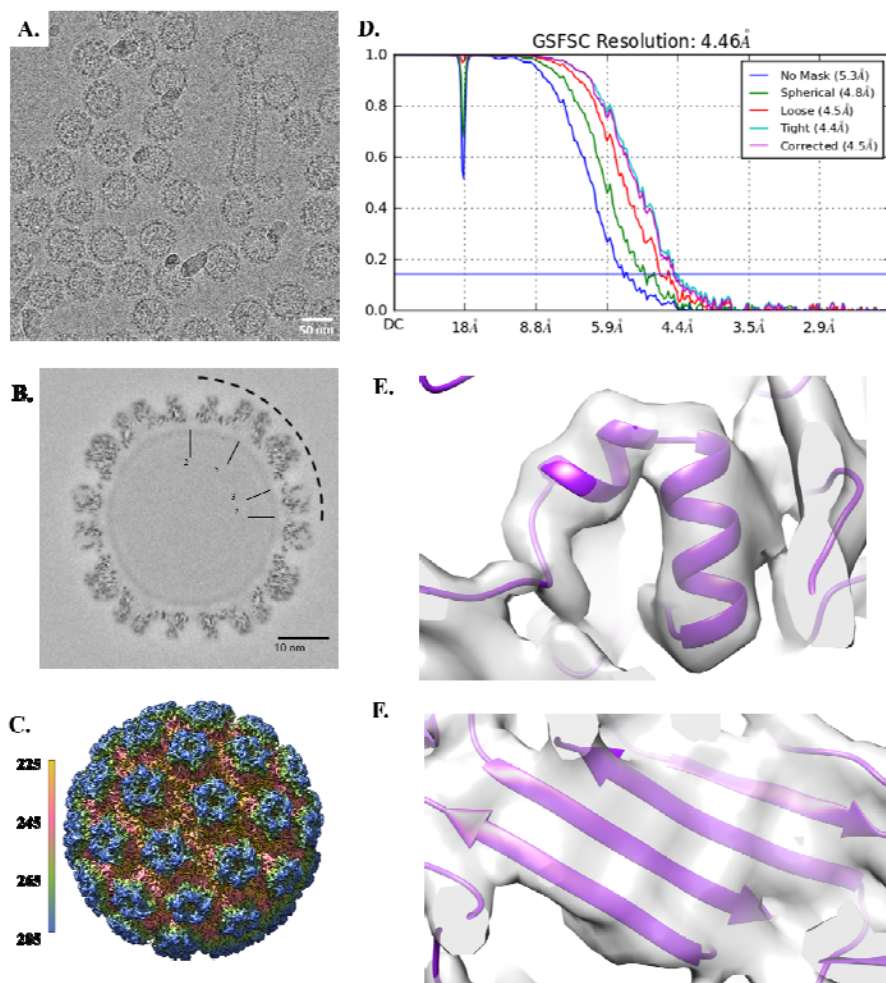

821  
822 **SFig 1. Icosahedral Reconstruction.** (A) Representative micrograph 1,164 out of 8,936  
823 collected. (B) Central cross-section of icosahedral structure with the symmetry labeled in the  
824 dotted region. (C) Full icosahedral reconstruction colored radially in Angstroms. (D) FSC Curve  
825 for icosahedral refinement. (E) Representative alpha helix (amino acid residues: 385-394, 396-  
826 401) at 4.5 Å. (F) Representative beta sheet (amino acid residues: 71-76, 335-325, 153-160, 254-  
827 248) at 4.5 Å.

828



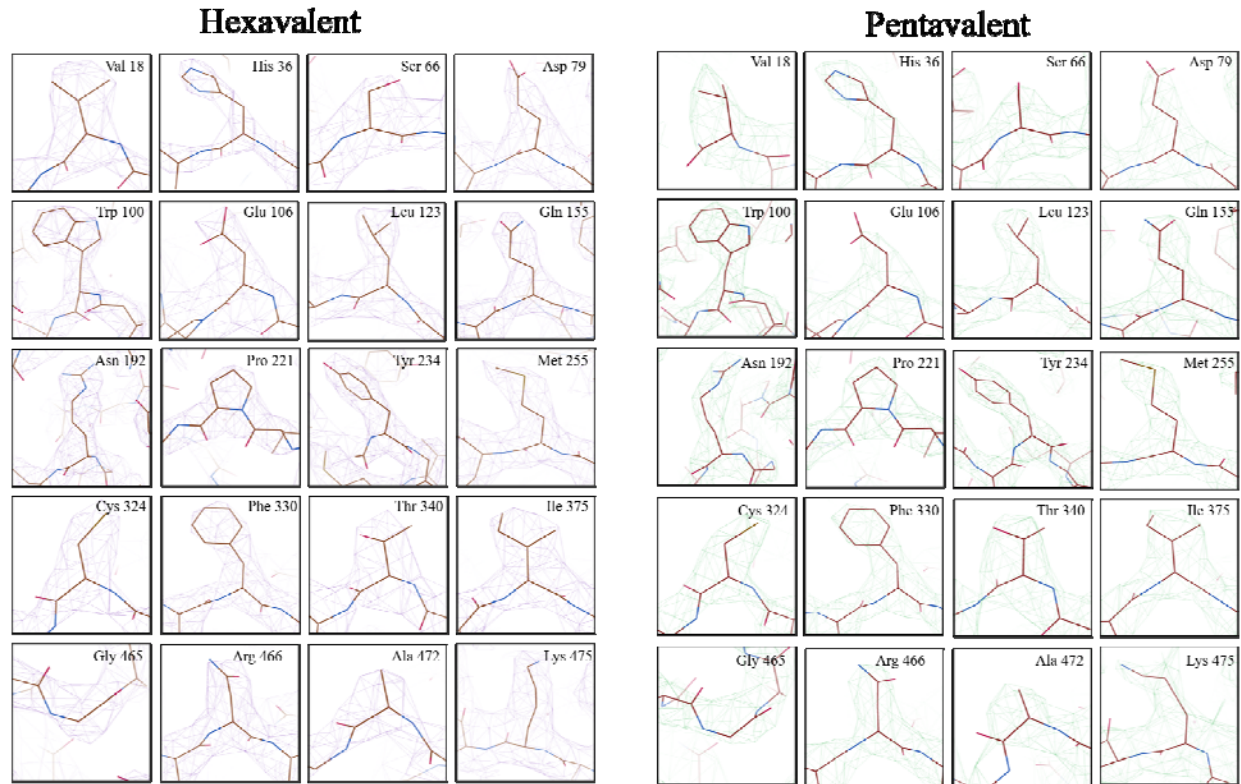

829

830 **SFig 2. Representative density of all side chains in pentavalent and hexavalent capsomers.**

831 Representative side chains were chosen from L1 (brown) and compared between the pentavalent  
832 (purple density) and hexavalent (green density) capsomer environments.

833

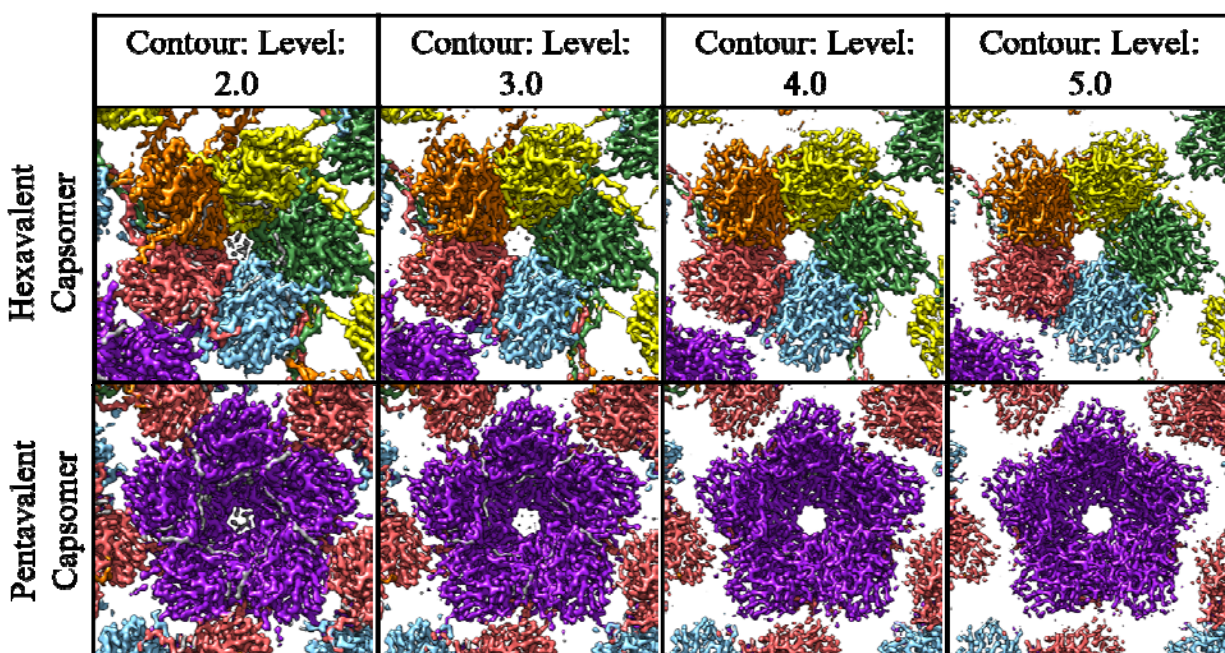

834

835 **SFig 3. L2 Density.** The surface rendered hexavalent (top) and pentavalent (bottom) capsomer  
836 density maps were colored as in Fig. 1A within 2Å of the L1 protein chain with unfilled density  
837 (gray) corresponding to L2. The L2 density is stronger in the pentavalent capsomer as can be  
838 seen with the changing contour of the map. In the hexavalent capsomers the same internal  
839 density can be noted, but the density disappears along with noise. Two distinct areas of gray  
840 density can be seen that are correlated to each chain of L1 in the capsomer.

841

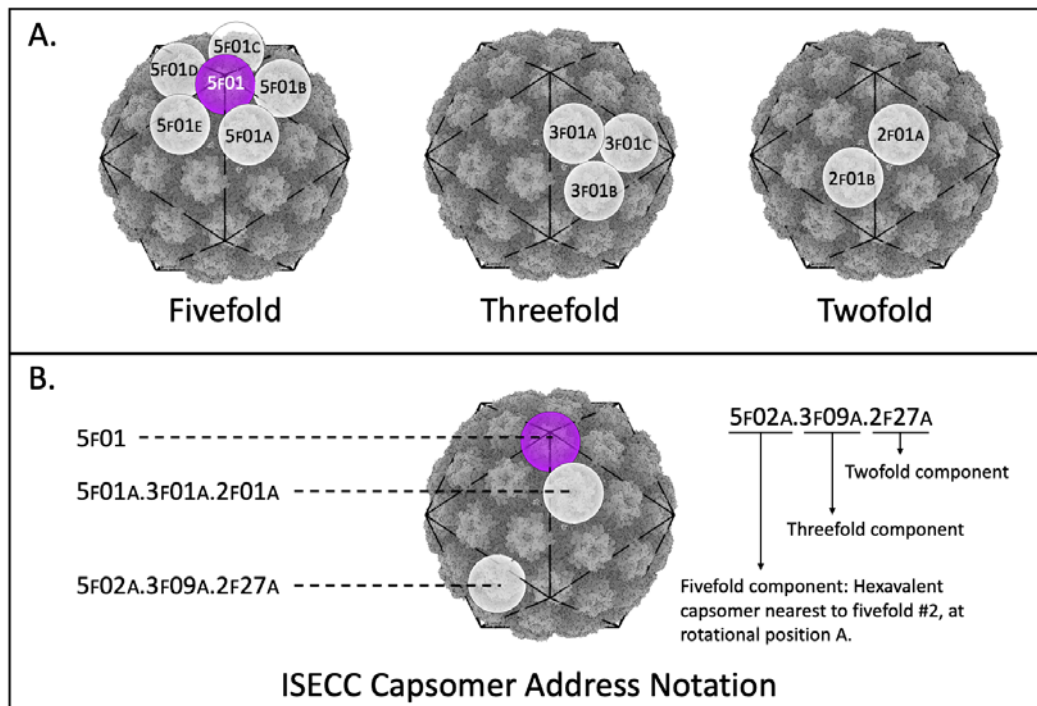

842

843 **SFig4. Capsomer addresses assigned in ISECC.** A) Each capsomer is assigned a name  
844 identifying the nearest symmetry vertices. Pentavalent capsomers only have a fivefold  
845 designation without any rotational parameter (left, purple). Hexavalent capsomers receive  
846 designations for the nearest fivefold (left), threefold (center), and twofold (right) axis, as well as  
847 rotational parameters. B) Examples of complete addresses implemented in ISECC are shown as  
848 one-part (pentavalent) and three-part (hexavalent) capsomer designations. Addresses are  
849 assigned during subparticle generation after normalization of the input vectors to a standard,  
850 shared asymmetric unit. This allows refinement parameters for any given subparticle to be  
851 correlated with other subparticles from the same parental particle.

852

853 **Supp. Table 1. Cryo-EM data collection, refinement and validation statistics**

| <b>Data Collection and Processing</b>  | <b>Icosahedral</b>   | <b>Pentavalent Capsomer</b>                   | <b>Hexavalent Capsomer</b> |
|----------------------------------------|----------------------|-----------------------------------------------|----------------------------|
| Magnification                          | 59,000               | 59,000                                        | 59,000                     |
| Voltage (kV)                           | 300                  | 300                                           | 300                        |
| Electron Exposure (e-/Å <sup>2</sup> ) | 60                   | 60                                            | 60                         |
| Defocus Range (um)                     | 0.5-3.0              | 0.5-3.0                                       | 0.5-3.0                    |
| Pixel Size (Å)                         | 1.1                  | 1.1                                           | 1.1                        |
| Symmetry Imposed                       | I1                   | C5                                            | C1                         |
| Micrographs Collected                  | 10,143               | -                                             | -                          |
| Micrographs Rejected (Bad Ice)         | 1,207                | -                                             | -                          |
| Micrographs Accepted                   | 8,936                | -                                             | -                          |
| Initial Particle Number                | 202,705              | -                                             | -                          |
| Final Particle Number                  | 181,299              | 181,299                                       | 181,299                    |
| Subparticles per Particle              | -                    | 12                                            | 60                         |
| Final Subparticle Number               | -                    | 2,175,588                                     | 10,877,940                 |
| Map Resolution (Å)                     | 4.46                 | 3.15                                          | 3.08                       |
| FSC Threshold                          | 0.143                | 0.143                                         | 0.143                      |
| <b>Refinement</b>                      |                      | <b>Recombined Icosahedral Asymmetric Unit</b> |                            |
| Model composition                      |                      |                                               |                            |
|                                        | Non-hydrogen atoms   | 22492                                         |                            |
|                                        | Protein Residues     | 2864                                          |                            |
| B-Factors                              |                      |                                               |                            |
|                                        | Protein              | -                                             |                            |
| R.m.s. Deviations                      |                      |                                               |                            |
|                                        | Bond Length (Å)      | 0.006                                         |                            |
|                                        | Bond Angles (°)      | 1.025                                         |                            |
| Validation                             |                      |                                               |                            |
|                                        | MolProbity Score     | 2.65                                          |                            |
|                                        | Clash Score          | 13.17                                         |                            |
|                                        | Rotamer Outliers (%) | 5.10                                          |                            |
| Ramachandran Plot                      |                      |                                               |                            |
|                                        | Favored (%)          | 92.18                                         |                            |
|                                        | Outliers (%)         | 0.46                                          |                            |

854

855

856 **Supplemental Table 2. Sequence Alignment of Ser306 – Ile328 Loop Region**

| <b>HPV Type</b> | <b>Overall Sequence Percent Identity</b> | <b>Sequence Percent Identity of Loop</b> | <b>Sequence</b>                                         |
|-----------------|------------------------------------------|------------------------------------------|---------------------------------------------------------|
| 16              | -                                        | -                                        | SDAQIFNK <u>PYWLQRAQGH</u> NNGI                         |
| 31              | 82.97%                                   | 92.3%                                    | SDAQIFNK <u>PYW</u> <b>M</b> <u>QRAQGH</u> NNGI         |
| 52              | 76.82%                                   | 100%                                     | <b>ES</b> <u>QLFNKPYWLQRAQGH</u> NNGI                   |
| 58              | 76.23%                                   | 100%                                     | <b>ES</b> <u>QLFNKPYWLQRAQGH</u> NNGI                   |
| 33              | 79.60%                                   | 100%                                     | <b>ES</b> <u>QLFNKPYWLQRAQGH</u> NNGI                   |
| 11              | 68.83%                                   | 92.3%                                    | <b>EA</b> <u>QLFNKPYWLQ</u> <b>K</b> <u>AQGH</u> NNGI   |
| 6               | 68.59%                                   | 92.3%                                    | <b>EA</b> <u>QLFNKPYWLQ</u> <b>K</b> <u>AQGH</u> NNGI   |
| 45              | 65.51%                                   | 84.6%                                    | SD <b>S</b> <u>QLFNKPYWL</u> <b>H</b> <u>KAQGH</u> NNGI |
| 18              | 65.87%                                   | 84.6%                                    | SD <b>S</b> <u>QLFNKPYWL</u> <b>H</b> <u>KAQGH</u> NNGV |

857

858

859 **Supplemental Table 3: Custom ISECC metadata**

| <b>Metadata label</b>                        | <b>Example</b>                                               | <b>Description</b>                                                                                                                                                                                                                                                                                                                                                                                                     |
|----------------------------------------------|--------------------------------------------------------------|------------------------------------------------------------------------------------------------------------------------------------------------------------------------------------------------------------------------------------------------------------------------------------------------------------------------------------------------------------------------------------------------------------------------|
| rlnImageOriginalName                         | 000004@<br>{micrographname}.mrcs                             | Existing metadata label. Repurposed to carry the identifier for the particle image from which a subparticle was derived.                                                                                                                                                                                                                                                                                               |
| rlnCustomUID                                 | subparticleUID_<br>000000001                                 | Sequential, unique value identifying each subparticle                                                                                                                                                                                                                                                                                                                                                                  |
| rlnCustomVertexGroup                         | Pentavalent:<br>5f08<br><br>Hexavalent:<br>5f08c.3f02b.2f27a | Pentavalent capsomers are given a numerical value for the 5f symmetry axis on which they lay. There are 12 unique options for this metadata label.<br><br>Hexavalent capsomers are designated by the nearest 5f, 3f, and 2f symmetry axis, as well as as a letter (a-e, a-c, a-b) designation the counter-clockwise rotation order about the given symmetry axis. There are 60 unique options for this metadata label. |
| rlnCustomRelativePose                        | 0.809,<br>+0.309i,<br>-0.500j,<br>+0.000k                    | Capsomer orientation relative to icosahedrally-refined capsid, in quaternion format                                                                                                                                                                                                                                                                                                                                    |
| rlnCustomOriginXYZ<br>AngstWrtParticleCenter | -125.7926, 15.1589,<br>-102.4911                             | Capsomer origin relative to icosahedrally-refined capsid, in Å                                                                                                                                                                                                                                                                                                                                                         |

860

861

862

863
